# Supplementary material for: Electronic structure of the para-dinitrobenzene radical anion: a combined 2D photoelectron imaging and computational study
Source: Royal Society of Chemistry journal article supplement (doi:10.1039/c8cp04877k), 2018-01-01
Supplement: c8cp04877k1.xlsx [file c8cp04877k1.xlsx]

## Sheet: Radial Spectra
eKE	2.06667	2.13793	2.21429	2.2963	2.38462	2.48	2.53061	2.58333	2.6383	2.69565	2.75556	2.81818	2.88372	2.95238	3.02439	3.1	3.10008	3.17949	3.26316	3.35135	3.44444	3.54286	3.64706	3.75758	3.875	4	4.13333	4.27586	4.42857	4.59259
0	0	0	0	0	0	0	0	0	0	0	0	0	0	0	0	0	0	0	0	0	0	0	0	0	0	0	0	0	0	0
0.000189034	12328.4	38135.3	5788.06	15754.6	7808.3	9968.08	7676.83	6386.94	7389.13	17460.5	13380.9	20378.6	26271.8	29912	27441.5	27963.8	25920.9	36472.1	33999	25732.6	31704	26265.6	18231.5	22755.3	24485	16290.4	13208	5120.97	-1591.14	4955.57
0.000756137	11845.5	41615.8	3433.22	18386.7	7519.21	9332.52	6286.63	4203.9	11475.6	13168.1	12371.1	20824.3	30784.4	36956	31967.4	24649	38390.4	39327.5	34737.7	36423.7	25097.7	37753.3	25813.9	29961.5	27050.3	18095.3	9993.86	3109.4	4818.04	3297.92
0.00170131	16889.7	55664.9	8615.42	27661.6	8459.17	17732.8	8396.54	10160.9	17948.2	18221.8	20646.4	33031.5	48103.8	50454	50690.4	38575	50387.7	56217.6	49670.2	43783.9	40474.7	41778.5	37682.3	52676.9	38389.8	27686.5	19262.2	8676.4	6333.21	6442.2
0.00302455	19414.6	51822.2	9348.89	27088.3	11397.8	19136.9	10656.7	8933	16533.6	16878.5	16373.1	31627.3	46212.3	48076.9	45953.9	37735.5	50323.8	66802.1	48160.2	46397.8	40195.9	44395.3	32879	47655.3	37491.5	27040.9	25330.1	6311.49	7033.65	7786.12
0.00472585	24641.5	59671.1	10748.1	33463.6	18227.2	20595	13058.9	13225.5	22435.3	20818	19947.4	38195.5	56324.4	61223.6	53507.4	47854.7	62800.8	82363.4	64810.7	58212.8	46727.6	56347.3	46937.7	65364.1	45819.2	37725.4	29340.8	7055.87	6625.33	14418.3
0.00680523	24215.2	52971.4	12606.1	31124.5	15309.2	19342	13060.5	11038.3	20628.3	21366.4	18928.1	35826.6	51618.3	57468.2	52778.4	43776.3	56012.1	74339.8	60133.9	47533.2	43945	50247.8	42962.8	59415.8	42585.4	40518.8	28382.7	7982.97	4360.87	13619.1
0.00926267	23562.1	52944.5	11746.2	31154.7	15865.2	21194.9	14785.6	9640.72	20943.3	22100.3	18466.1	35650.5	52403.7	56570.1	55515.9	42493	62395.9	72812	57640.6	50582.4	49414.2	51952.4	45510.5	58387.8	49327.8	36226.9	24233.9	8070.92	6847.44	11259.5
0.0120982	21839.2	47088.3	11381.4	29062	17172.2	17783.1	14393.7	8920.35	18819.8	20139.5	17244.6	35311.1	48224	54034.4	51870.3	41505	66149.4	68737.8	54908.8	53108.5	49428.3	50625.4	46992.7	57646.1	47371.9	36105.1	26779.9	7935.97	6938.92	12613.6
0.0153118	18324.6	42064.9	11599.8	26120.3	16507.9	15397.4	14572.2	9755.03	19191.7	17942.5	17789.1	29895.5	42964.1	49878.4	47575	39505.8	58308.7	64855	53791	47810.4	44154.3	48286.7	44120.9	58075.6	41389.3	34484.8	26554.8	8186.79	7421.7	9595.97
0.0189034	17479.4	37894.4	12872.3	22785	17393.9	14762.9	14480.3	9906.76	18394.4	18137.1	17053.6	28165.3	42772.8	46379	43130.4	38511.6	54948.2	62426.8	52229.5	50366.5	42980.7	47118.8	40854.4	57173.2	43189.3	32537.5	24370.4	7911.87	7564.11	10371
0.0228731	15537.6	32686.6	12437.5	19821.6	16059.5	13328.4	15226.8	8746.15	17123.9	15951.9	14250.5	25466	39441.4	41097.9	38773.8	36594.4	50873.2	58435	49329.3	43287	38605.8	46465.2	36588.3	53643.5	42528.6	31000.9	21534	6044.83	5682.61	9038.26
0.0272209	12940.2	29951.8	13800	17447.8	18522.4	12862.2	15471.3	9380.25	15213.7	15050.4	14158.6	24266.3	35770.8	40500	35289.4	30986.3	46299.7	55068.1	45052.3	42867.5	37948.3	43727.7	31936.1	47546.6	40175.6	31586.7	23661.3	8526.09	4272.2	9579.3
0.0319468	11182.1	22996.9	15137.2	13743.1	19109	10550.3	13953	7770.87	13018.8	15060	13023.5	22073.5	31331.4	36612.2	30612.8	27770.1	40443	49643.7	40044.3	36377	33152.6	36068	29323.5	43111.6	31540.1	28754.2	19085.1	6235.61	4246.12	6177.94
0.0370507	11695.6	21754.8	15932.1	13609.2	23405.8	10425	15782.4	6610.69	11760.7	14379.4	12039.6	19718.6	29650.6	34195.8	30171.1	27404.2	41890.4	50325.1	40410.3	37390.3	33508.4	33022.1	32187.3	46425.3	32693.9	25632.4	17413.5	7280.39	5593.28	3607.36
0.0425327	11669.4	19434.4	18732.5	13770.1	27230.9	10508.3	16385.9	8300.77	14236.5	15928.1	13759.6	21271.4	32103.4	33199.4	32596.4	27191	41462.9	48449.4	42581.7	37870.9	35209.4	35639.4	32485.5	44063.1	31706.1	24024.1	19580.5	7472.1	5863.75	10867.8
0.0483927	11034.5	18031.3	21352.2	9989.17	26586.3	7641.34	16012.8	8346.65	10830.8	13977	9757.87	17844.1	29071.9	29022.5	28666.6	25376.1	37261.3	43444	36834.1	34182.1	31531.6	34921.8	30925.2	39101.4	32544.2	26508.9	19770.1	7339.4	4736.5	9355.92
0.0546309	14054.6	15469.9	26047	8538.79	28628	7765.42	16444.9	9792.62	10944.4	12410.1	10885	17699.8	28077.2	27999.8	28074.8	23285.4	40278.1	43342.2	34380.6	34349.3	29629.2	35862.3	32523.3	36860.9	31288.9	24613.3	18228	5885.2	5179.15	7420.41
0.0612471	14815.4	13023.7	28623.8	7364.64	29803	5953.36	13953.3	9829.55	8959.95	10068.3	10343.3	16370	23461.1	26081.6	23268.4	20648.3	34329.1	39121.8	33063.1	28921.6	29426.9	31694.3	26453.5	34752.3	26015.1	22041.5	15412.5	4942.02	3605.62	8840.94
0.0682413	23874.5	14042.5	29765.5	8894.02	33286.3	7406.73	12550.2	10654.2	10317.4	11862.3	10759.2	18014.9	25222.2	26771.4	25278.3	23518	33808.8	40771.6	35893.2	32841.8	28740	32508.8	30220.5	39777.1	31120.5	24802.2	19360.1	6215.75	3813.94	9447.64
0.0756137	30660.2	13825.3	25375.2	8970.79	31518.8	7495.37	12150	10982.4	10474.9	11002.5	11741.4	15706.9	24327.5	24152.4	25125.8	23513.5	34319.3	40303	34032.8	32693.7	27886.8	30054.6	28050.7	39296.6	31981.4	21475.7	16952.1	7367.15	5976.95	7818.86
0.0833641	36253	13299.8	20819.9	8209.69	28817.1	7548.08	12224.5	11399.1	9459.15	11642.2	10933.8	15236.8	22510	23059.3	21952.6	21000.5	33851.5	38899.2	30910.9	28943.8	25944.8	30941.2	24588.5	34574.2	27637.7	21561.4	18472.8	6522.81	6139.96	7066.7
0.0914925	31583.9	11304.7	15839.6	7986.47	23878.7	6144.43	11113.3	10950.6	10301	9400.24	10285.5	14947.7	20328.9	21215.7	20917.9	19067.9	30519.5	35870.5	32013.6	27031.2	25772.9	27369.7	25258	33921.9	23314.7	20972.2	15674	6564.55	4850.72	9096.63
0.0999991	22425.4	10979.6	10620.5	9274.12	19890.9	6776.65	8695.19	12014.6	10009.7	8193.59	9705	14914	19027	19895.2	18952.6	18881	27080.5	32818.9	29695.5	25305	24548.5	25712.2	23785.1	35593.8	22039.7	18875.3	14770.2	5368.61	6656.1	8807.09
0.108884	15300.5	10217.7	9003.11	11366.6	17138.4	7074.94	9018.76	12638	11317.1	9479.26	9939.95	13652.1	19249.1	20895.8	20170.6	18759.1	28105.2	35312	27063.7	25790	24069.8	28875.9	22395.6	32103.7	22505.5	19571.5	14579.3	4440.01	4476.97	7934.14
0.118146	10705.4	9828.56	7175.97	14580.5	14240.7	10037.6	8189.12	11150	12331.6	9229.23	9977.08	13436.5	18910.2	19596.2	19877.9	17057.6	27816.6	32799.7	26250.5	24635.1	22371.8	27893.1	21938.3	29165.9	24111.2	19249	15171.1	4684.79	2008.59	6855.96
0.127787	7957.13	11060.3	6099.59	20665.3	12726.1	12958.2	8037.95	10570.3	14018.1	9518.42	8978.85	12706.4	17856.2	18613.7	19009.4	17540.4	28861.7	30395.1	28053.8	24776.8	23790.7	25715.4	20799.3	30299.9	23816.2	19175.7	15700	5587.57	3408.28	6109.43
0.137806	5693.17	11931.4	5471.94	24667.6	10639.7	15307.5	8076.91	9450.17	13506	8920.9	7513.93	12488.1	16204	16678.2	16952.2	15900	25307.3	31182.4	26122.5	25331.6	22291.1	25334	20180.3	30025.9	24392.1	18445	14168.1	5414.01	4415.75	8630.11
0.148203	3847.49	13132.4	4269.51	24351.4	7952.31	15380.6	7587.23	8540.61	12678.1	8052.19	7150.3	11794.9	16090.6	16368.7	16169.1	14492.3	22271.8	29866.9	23917.4	24514.8	20795	23676.2	21745	30900.7	22595.4	18665	12512.9	4085.86	4154.14	6396.05
0.158978	3415.14	12425.9	3631.28	18255.6	7327.93	14059.5	8770.89	7181.04	12594.6	7807.82	7920.31	11776.4	17740.7	17405.7	15815.8	16043.6	21347	27985	25175.9	21126.5	22271.2	23065.8	21425.1	31394.3	23498.6	17845.5	11907.6	4227.18	4795.44	6464.84
0.170131	2440.58	9210.36	2957.94	11086.8	6032.59	12199.1	9417.65	5436.22	10011.1	8081.88	6878.33	10722	15102.7	15508.7	14341.6	13795	21903.6	27474	21747.8	21766.2	19304.3	21197.6	17738.5	28364	22301.2	16786.6	14267.6	4513.14	3022.21	5395
0.181662	1774.06	6618.85	2335.4	7739.71	7369.44	9944.29	11740	5093.93	9623.72	9525.4	6275.04	11197.1	12801.2	13531.5	14055.2	13232.4	21307.5	25773.7	20798.8	20961.6	16852.2	21644.9	17927	27162.8	19318.2	14867.5	11320.7	4303.11	4333.39	5876.89
0.193571	1652.42	5146.81	2736.86	5058.33	8913.7	8120.03	11799.2	3978.19	7818.35	8234.99	5456.71	9618.28	12176	12225.9	11375.4	11638	17634.6	22517.3	18244.6	16233.4	13112.4	20171	15416.5	22108.2	16611.4	12720.4	9004.36	2517.5	3164.91	4305.6
0.205858	1243.19	4443.5	4480.46	4277.29	12823.3	6336.83	14128.2	6123.01	7895.22	9637.11	6120.54	8227.56	12605.3	12636.9	12385.9	12007.3	16704.2	18250	14918.8	15816.9	14749.4	18253.6	15977.1	23137.8	16621.8	12687.1	9527.37	2746.84	2537.17	3274.79
0.218523	1286.64	4179.08	6896.96	3540.14	17590.8	5506.98	14235.2	7021.69	6739.51	9133.42	6803.68	8012.23	12384.2	11355.1	11692.5	9662.7	15981.1	16787.8	15436.8	14360.1	15285.6	15295.6	14677.9	20836.1	15878.4	12620.5	9147.49	3536.84	2414.32	4707.53
0.231567	1224.26	3439.62	6956.89	2708.37	19234.6	4908.85	12798.4	9060.18	6032.55	8412.49	6623.18	8552.91	11779.5	12139.7	11127.9	10133.5	15174.1	20629.5	16426.1	15773.5	12162.2	15945.8	13894.6	20043.7	16042.4	11971.4	11008.5	3336.24	3240.25	4899.19
0.244988	1018.65	3058.9	5172.37	2685.29	16652.8	4532.03	10466.3	11601	6689.73	8378.94	9028.96	9233.42	11937.6	12427.9	10297	11102.8	15999.8	19678.9	15564.6	15529.9	13694.5	17188.5	14619.6	23187.3	15438.6	13064.5	10997.8	3937.11	3578.94	6184.64
0.258788	871.103	2139.45	2827.18	2342.15	11232.8	4225.41	7652.19	11480.2	6889.61	5172.02	7171.92	8705.01	10860.1	11037.5	10081.9	10205	15259.5	17249.5	14057.1	13080.1	13877.1	15650.8	12913.8	19746.3	14113.4	11059	9060.9	3394.39	2032.07	3511.79
0.272965	728.222	2707.47	1752.18	2707.81	7709.26	4959.44	6633.91	11632.1	8430.36	6034.39	7547.91	7768.92	11298.3	10766.1	10048.2	9480.13	13680.6	18817.8	14806.3	12958.4	12430.5	15858.9	14384.6	18919	12808.7	10504.7	8670.89	3392.14	3400.29	4484.27
0.287521	603.758	2345.74	1575.77	5081.71	5549.65	6739.31	5649.23	9673.6	11500.1	6230.33	6863.53	7994.73	10577	10083.5	10118.2	9944.33	14320	18123.1	12831.8	13182.1	11260.8	14688.8	13228	19042.1	12560.4	10583.5	8036.8	2297.41	2560.52	5169.72
0.302455	520.216	2316.19	842.102	6258.81	4206.84	9338.08	4853.94	6825.06	12312.8	5936.26	6203.37	8260.77	9477.66	9498.13	9657.38	9688.87	13930.2	17413.5	11250.1	13320.6	10302.2	13224.2	13121.7	19569.5	14264.4	10328.3	8434	2167.97	3112.32	2692.63
0.317766	667.02	1930.15	702.836	5775.7	3729.01	11792.9	6319.71	5379.86	11670.1	6636.28	5922.84	9619.91	10403.6	9711	10255.4	9562.62	12753.5	17693.5	14326.9	12111.9	11964.5	13680.7	13774.4	19004.5	13990.9	9595.56	8241.51	3024.92	3149.56	896.016
0.333456	507.449	1863.13	559.633	3864.4	3251.89	10878.7	8173.18	4959.26	11186	8016.97	4944.11	8897.62	10179.8	10089.1	9951.03	8947.6	13125.8	16483.9	14395.4	12514.3	11230.6	12834.8	12169.3	16763.7	13022.4	9114.8	7314.45	2171.46	2047.7	3265.42
0.349524	434.636	1525.92	569.418	2146.64	3792.74	7935.81	13029.4	5018.34	9733.99	10388.3	5616.87	7888.4	10537.2	9603.26	9016.11	9232.65	14609.1	15648.6	13591.5	12796.1	12403.1	14592.6	11416.1	18626.4	12840.7	10353.1	7595.3	2336.57	2234.39	5836.79
0.36597	436.86	1196.85	486.449	1397.34	5665.78	5571.11	15463.7	5772.77	6622.03	11649	5096.47	7318.04	11050.8	9544.23	9336.64	9239.98	14416.1	16470.8	13488.9	12382.7	10083.3	13431.2	11116.1	17647.3	9836.07	8903.95	7954.11	3683.07	1165.69	4685.98
0.382794	391.773	1574.25	434.631	1177.85	8213.02	4217.03	14092.6	7219.57	6264.48	11439.4	6734.6	7251.37	11075.8	9655.73	8770.02	9039.45	12148	16858.2	13807.6	11183.6	10071.2	13329.3	12469.7	16725.3	11541.9	8586.4	8112.99	2727.53	924.138	3070.24
0.399996	344.941	1281.76	447.47	838.726	8506.13	2782.72	10095.1	10060	5638.14	9576.71	8833.23	7324.15	10884.4	9040.96	9020.8	9044.77	14113.2	14136.5	13912.1	12051.7	11034.1	13141.2	11182.2	16801.8	13744.9	10500.9	6624.88	1638.81	2831.3	3299.45
0.417576	304.165	1077.23	245.703	428.032	5417.25	2120.65	6688.92	12179.3	6651.67	7515.15	10155.1	7578.92	9661.56	10007.1	9357.37	9132.12	14666.2	15186.1	12979.6	12657.2	10364.8	12013	10904.6	16856.9	13425.8	10501.6	6280.85	1714.4	2255.44	4132.57
0.435535	194.502	1323.48	284.65	408.537	3026.58	3034.47	4778.27	11120.8	7998.48	6185.31	8914.39	7915.13	9698.59	10306.9	8820.4	8589.93	14478.7	17638.1	12456.4	12756.1	10762.7	11283	10475	15015.2	11424.6	10142.2	6268.78	2160.45	951.672	4762.99
0.453871	301.701	973.294	218.405	409.979	1735.21	4705.23	3812.58	8123.37	11256.1	5674.89	7749.97	10118	9427.74	10491.4	9110.05	9805.29	14850.8	16396.5	13346.2	12840.3	11143.8	10499.2	10902.8	16096.3	11577.3	9848.04	6461.91	2334.78	1895.22	3857.34
0.472585	259.558	1074.61	224.38	382.014	1210.94	6738.13	3718.46	5199.29	13950.1	5735.35	6090.62	11559.7	9120.02	10188.1	9205.14	8964.61	15031.4	15839.7	14443.6	12997.5	11618.7	11127.5	11193.6	17080.7	13747.3	9365.76	8252.29	1477.26	1935.46	4837.61
0.491678	226.095	1001.44	227.225	343.56	664.156	6674.92	5036.68	3891.43	12808.6	7417.04	5324.86	11030.8	10032.3	9281.26	9402	9665.9	14594.2	17298.8	14468.7	11046.3	10721.2	11850.7	12656	16025.1	13585.5	8271.46	7794.56	2347.76	2051.57	3496.35
0.511148	229.771	808.612	255.248	220.301	649.913	4109.38	7267.06	3237.12	8454.28	10335.8	5509.44	9213.24	11358	8665.92	9095.71	8849.63	13452.6	17472.1	14121.7	13161.5	10007.1	12804.1	11174.7	15675.4	12736.7	9268.87	7181.79	3060.08	1707.82	3131.57
0.530997	196.04	802.375	181.502	220.712	677.978	2160.67	9174.96	3787.67	6172.66	12963.5	6618.91	8261.63	12517.8	9025.41	9081.82	9285.34	14629.4	16346.1	14873.8	13590.1	10864.7	13989.2	11387.4	16671.1	11917.8	9642.38	6814.73	1946.13	2094.26	3339.57
0.551224	77.3529	725.329	174.942	161.904	489.813	1355.68	7687.68	4714.83	4380.96	10659.1	8288.91	6430.99	12409.3	9018.51	8981.89	9076.2	15639.8	17527.4	14634.2	11385.4	11412.4	13632.7	9260.47	17815	11048	10162.3	6477.42	3256.25	1877.01	5288.11
0.571828	152.631	647.467	162.966	174.907	393.199	760.397	4031.22	7245.51	4075.12	7304.75	10264.5	6828.6	10659.8	10401.8	8667.2	9292.44	15590	18970	14296.4	12692.5	11764.6	14153.2	9296.55	16903.4	11797.9	9953.83	8516.34	2856.8	1841.34	5527.72
0.592811	201.935	738.898	97.1778	158.034	409.426	650.428	2409.73	7474.13	4812.02	4974.01	9833.73	8023.54	8966.42	10816	8651.92	9590.42	15878.6	18008.6	16249.4	15536.2	11680.9	13520.3	10775.1	16533.5	11881.6	10218.4	8000.69	3082.96	2420.36	3174.11
0.614172	158.922	603.68	99.3875	178.364	254.062	484.273	1447.92	4827.06	6753.16	3871.54	7970.05	10023.4	8373.01	10505.4	8586.97	10007.1	16745.5	18085.2	16162.7	15031.5	12336.6	13623.5	11743.3	17089.5	11941.3	9858.09	7335.3	3097.35	2946.55	4082.69
0.635911	74.6329	585.471	114.963	64.3437	326.606	418.733	866.552	2436.34	8129.5	3987.71	4880.04	11256.9	8506.11	9757.57	9329.94	8875.5	15751.3	17977.1	15800.5	13609.7	12061.4	14151.9	11980.7	16058.3	12565.6	10235.1	8023.02	3525.25	2329.28	4922.15
0.658028	100.78	467.89	70.3611	138.227	245.947	278.543	693.479	1408.72	6289.52	5157.25	3826.12	10538.3	8993.72	8853.46	9029.87	8848.76	15526.2	19898.5	15794.5	14408.3	11535.9	13300.9	11833.7	15414.1	12475.2	10555.8	7656.87	2823.78	2262.1	5161.44
0.680523	134.174	382.066	104.33	97.326	229.502	304.728	557.43	933.175	3549.19	6955.33	3723.64	7271.69	10732.7	7547.32	8861.31	8347.84	15081.8	19328	16018.2	14631.7	12482.1	15493.9	11447.9	16421.6	12181.4	10359.2	8401.84	2064.36	2071.52	3906.67
0.703396	136.39	391.654	74.6754	71.5169	146.185	298.513	491.417	754.576	2014.3	6806.05	5159.12	5403.42	11278.8	7207.73	8236.84	8762	16575.7	17585.6	16146.7	14568.6	14182.9	14685.8	11257.3	16284.6	12335.8	10696.5	9110.56	3184	1936.76	4399.12
0.726647	102.112	339.586	45.2321	82.245	201.924	194.677	480.593	541.366	1265.17	4229.13	5732.5	4341.67	9665.44	8753.53	7206.93	8998.43	17300.4	18356	16295.6	14839.9	14626.8	14674.6	13300.3	17009.6	12266.9	10483.6	9439.84	3144.9	3609.36	5057.66
0.750277	137.802	272.964	38.0117	83.1826	122.526	148.94	314.969	487.99	948.435	2381.1	5569.38	4980.75	7078.5	9558.19	6712.81	9327.38	17083.6	17663	17948.9	15403.1	15816.4	15185.4	13601.5	17175.8	13159.4	9723.79	9358.19	3499.82	3142.18	5184.87
0.774284	44.9987	398.656	17.2648	51.6857	180.885	128.997	229.273	326.455	813.671	1448.34	3777.37	5420.33	5409.36	9096.42	6358.75	8643.5	16761.6	17958	16965.7	15274	14821.9	15504.2	13795.7	17758.5	12255.9	9987.62	9407.35	2936.98	1902.35	5346.8
0.798669	63.5541	410.715	34.8683	49.5592	116.255	136.675	156.325	330.33	682.913	943.634	2238.16	6376.77	5130.83	7456.15	6896.04	8840.1	15392.9	20211.4	18154.6	16482.5	14124.6	18429.5	13057.5	20071.8	12639.7	10245.6	9141.17	3757.25	4316.78	6605.11
0.823433	181.842	339.351	32.9114	36.0005	107.847	120.838	242.461	315.04	458.728	722.145	1390.52	5125.09	5844.95	5648.68	7525.69	7677.28	14361.2	20370.8	17660.4	18040.3	15195.8	18712.4	14575.5	19291.5	11939.1	9859.59	8242.67	3454.61	3125.65	5855.01
0.848574	86.8122	225.354	27.8022	42.8853	84.9969	50.5642	148.307	207.639	486.363	548.783	1038.69	2976.59	6034.1	5151.62	7385.7	6777.59	13292	19755.5	17741.9	17904.6	16109.7	18012.7	15824.4	18648.7	13732.4	8592.99	9430.95	3625.12	3018.97	4851.62
0.874094	147.346	166.848	55.5669	22.4849	117.278	68.0363	158.544	244.767	307.15	733.113	719.872	1915.22	5841.46	4713.75	5523.47	6585.26	13523.8	19242.7	18166.2	17660.2	16011.9	19123.5	15554.7	19382.8	14328.2	8628.66	9682.28	3991.54	2516.4	4571.49
0.899992	140.78	179.656	20.2506	24.9544	48.7529	86.7499	140.905	138.059	277.565	445.312	651.348	1400.85	4117.11	4908.77	4558	6431.03	16215.7	17497.8	19092.2	16955.4	17873.3	20465.8	16430.5	20364.1	12711	9893.08	7718.43	3436.43	3247.87	4252.17
0.926267	85.9515	239.464	31.6998	41.4892	56.0704	21.703	121.228	110.486	276.29	362.928	588.319	1089.87	2745.15	4982.57	3887.25	7395.77	17915.4	14457	18500	15903.1	18504.2	20938.4	17208.1	20156.1	12417.7	10765.1	8190.5	3574.09	4087.09	5349.64
0.952921	104.779	203.902	22.243	17.4828	93.204	78.0307	50.4353	92.387	230.588	310.497	397.506	998.605	1887.59	4101.66	3873.5	7006.31	14022.7	15703.1	18650.3	17813.4	18466.5	21404.7	18001.1	19872.7	13175.9	11121.4	9316.69	3620.31	3111.8	6889.54
0.979953	154.19	255.326	20.3737	13.9357	31.9623	39.2868	61.4894	91.5116	177.833	254.836	358.342	749.146	1361.27	2688.16	4016.56	5642.51	10799.6	18265.5	15920.2	18787.8	16944.5	21403.2	18485.3	22222	14477.5	10194	8436.34	3692.84	3517.4	6646.18
1.00736	108.839	220.337	22.0008	11.9402	141.705	55.5891	71.0519	94.5823	85.5476	224.962	268.842	578.386	1221.29	1915.37	3547.24	4580.89	8693.01	18584.8	14434	18031.2	17261.2	22173	19643	22139.5	14116.4	9725.33	8039.92	3607.71	3031.53	4588.1
1.03515	121.494	187.454	24.7032	19.9892	29.3805	26.7974	48.3001	98.1912	107.975	156.48	199.34	528.28	1017.13	1563.57	2734.71	3598.09	8316.19	15279.6	15169.7	15914.1	18508.8	23171	18433.9	23278.6	13561.9	9553.97	7544.28	3455.46	2502.07	4328.56
1.06332	132.595	257.883	1.43697	21.7552	92.3496	18.1405	48.8321	74.7409	141.719	177.901	273.774	508.967	900.426	1382.95	2022.17	3743.45	9533.58	12450.6	16227.6	13926.3	19336.1	22322.9	19929.6	24469.3	13712.7	9318.42	7457.3	2726.78	2094.66	5812.74
1.09186	88.1976	288.402	32.1182	20.7821	-26.0545	13.7006	54.8353	26.1056	63.2325	98.9994	159.545	360.479	606.801	1085.05	1578.32	4040.05	9032.67	9579.4	15508.6	12930.9	18878.4	20656.9	20200.5	23948.5	13730.4	9411.65	7393.77	2665.57	2948.03	5376.23
1.12078	128.2	252.681	41.6714	21.0925	134.262	5.46949	22.1545	57.5661	74.2811	107.767	207.588	342.321	528.976	781.946	1299.49	3664.02	7120.91	9384.41	12267.3	14523.4	17663.1	20593	20701.9	25118.3	14637	9611.32	7377.31	2891.91	3670.48	5348.67
1.15008	92.6414	289.4	0.967013	15.3679	25.4973	52.9275	34.9336	15.3621	40.8859	99.297	118.595	294.457	554.277	606.572	1105	2580.44	4687.07	9924.24	9579.23	14120.8	14928.4	21314.3	21064.5	24158.6	14551.7	9928.41	7591.32	2559.89	2615.39	3249.87
1.17976	119.281	243.884	47.9408	22.1843	25.2022	18.714	36.2619	23.9898	64.0269	87.8803	95.6311	197.251	515.16	651.31	921.482	1812.01	3289.78	8940.52	8324.2	13882.5	13012	21656	19917.6	24208.4	15674.3	9877.89	7904.25	2904.18	2742.99	4916.79
1.20982	90.3878	180.814	11.9281	9.50016	60.8777	8.44173	-5.37175	34.6494	42.5055	12.072	79.9496	241.411	359.805	593.529	742.32	1425.24	2461.28	6376.84	8366.85	11207.8	12929.1	20734.7	19349	25123.2	16281.9	10080.2	7346.36	3464.87	3025.44	5682.78
1.24025	104.885	207.673	18.1432	3.35114	16.3891	-5.26197	41.7639	29.0431	32.8289	70.9751	68.5948	144.395	222.465	363.49	610.148	1167.73	1811.04	4554.31	8177.58	8059.77	13703.1	17049.2	19020.2	24937.6	15934.4	10481.6	6418.55	2518.33	2486.07	5136.62
1.27107	101.412	129.358	31.4383	10.6097	25.6216	17.7454	28.8958	46.6933	33.2978	27.0646	64.7038	113.253	265.772	349.932	506.897	941.246	1968.36	3658.47	7194.94	7286.29	13653.7	15392.7	18864.7	24386.5	15404.7	11146.7	7319.52	2063.97	2415.26	4269.48
1.30226	76.0766	183.379	7.4087	2.1029	69.3807	27.4082	6.89492	16.1211	41.202	57.6853	77.1719	161.755	239.849	284.643	318.042	839.586	1747.83	2717.98	4619.82	7313.37	10855.3	14581.4	18350.6	23104.4	15839	10992.3	6747.32	2278.9	2720.11	4360.97
1.33382	35.8974	217.188	18.4461	13.9801	9.61444	14.3722	37.8153	3.54102	53.2616	48.3584	13.9785	93.0902	212.777	253.983	367.799	853.798	1315.38	2513.05	3181.16	6845.7	7926.81	15553.4	16049.5	21625.6	16875	10107.2	6625.1	2583.31	2184.14	4679.23
1.36577	59.6373	165.76	24.322	5.26198	83.8753	1.37133	14.2899	32.51	24.585	44.2302	63.8564	129.147	146.985	152.748	297.603	493.784	1005.65	2026.26	2885.48	5549.5	6852.68	14627.6	14357	22472.7	17384.8	10053.7	7882.69	2786.08	2937.04	5429.25
1.3981	27.8522	75.4097	3.82654	-1.92552	25.8363	17.9908	13.9923	9.83331	39.4851	29.5317	64.3058	76.2689	102.012	174.461	235.191	461.172	722.973	1509.15	2180.54	3491.68	6621.53	11524.2	13912.4	23011	14820.2	10067.5	7685.74	2808.1	2866.06	4558.95
1.4308	27.5994	83.8989	20.6656	-1.76835	18.7812	-7.26774	4.3522	6.79722	9.051	17.4233	35.1479	47.4761	137.915	148.065	199.207	436.886	504.252	1379.03	1859.51	2754.03	6866.94	8977.52	14461.5	21639	14545.5	11247.3	8290.33	3691.05	2502.36	5490.08
1.46388	26.2433	50.2264	3.3215	14.2091	51.6213	29.5051	-1.03865	12.0603	16.0165	3.43941	44.3502	19.5543	127.031	114.918	182.302	295.697	568.771	1201.83	1582.81	2429.67	5327.31	7980.04	12979.6	18405.6	15850.9	12502.2	8406.05	4207.52	3295.73	5271.35
1.49734	11.1811	82.726	20.8537	20.5264	61.5742	8.30085	26.9523	-15.7939	5.40842	28.7175	6.04835	69.8257	52.074	131.426	136.419	278.504	591.107	892.29	1107.91	1987.02	3640.47	8125.99	11155.5	16890.1	18038.9	11863.4	8397.33	3624.91	3814.04	6059.14
1.53118	1.35698	55.7341	14.1833	0.280198	1.84572	4.29095	-0.0250765	25.1654	16.1981	8.95537	33.3593	84.4932	86.6434	94.1659	152.816	267.14	359.635	706.259	1121.49	1778.57	2460.17	7888.33	8412.19	16963.5	16656.5	10820.8	9739.17	4018.18	3169.6	6047.32
1.56539	11.1064	15.5032	7.56165	12.7798	82.3942	1.20993	5.65008	24.2406	21.4483	23.8114	-0.141378	34.0529	50.6543	46.4414	105.427	217.865	270.785	585.272	1071.03	1242.59	1877.37	5610.75	7312.45	18206.6	14673.1	12987.2	10808.9	5057.99	4284.92	6279.06
1.59999	2.30927	22.0805	12.1424	-9.10457	13.0662	-1.87748	18.3901	9.89401	13.1479	21.3329	24.4012	47.7821	67.7952	94.1164	84.5105	178.26	246.068	604.845	705.778	1046.93	1470.65	3587.88	7945.14	16550.2	13143	13556.4	10629.3	5743.92	4133.13	6761.5
1.63496	6.8396	17.0701	-5.98357	9.44923	53.4372	9.94693	11.7551	-4.3399	23.2415	9.52638	0.568558	16.7197	27.831	82.7253	68.249	129.566	264.621	581.344	639.554	899.062	1168.21	2655.57	7402.41	12673	13871.8	13439.4	10151.7	6244.21	5106.16	6694.78
1.67031	-2.03786	11.6578	-2.68567	-8.38375	30.9748	16.5613	15.2201	5.46469	23.2682	12.6666	22.4469	22.76	69.8386	53.4262	55.6554	139.759	171.817	470.882	576.038	642.768	1023.42	2061.04	5666.18	10016.9	15275.8	13411.4	11852	7524.73	5457.13	7122.78
1.70603	4.78069	-0.629813	5.93201	21.9764	45.0263	10.8554	-2.05199	1.09227	1.48693	21.9189	18.7869	32.2137	65.1218	44.0447	23.5778	98.8534	191.1	314.133	363.082	537.847	889.766	1973.73	3380.75	10046	13240.1	12271.8	13152.4	7362.62	6361.91	7981.17
1.74214	-5.8637	0.205141	9.75821	-4.26269	47.3438	3.6028	2.23299	20.4375	16.8884	13.1821	16.2728	24.2544	38.9024	39.1576	82.3414	89.765	144.337	244.803	303.097	417.407	761.768	1646.54	2491.41	9911.95	10936.6	12541.7	15058.9	6930.51	7146.08	8325.62
1.77862	3.75547	15.6313	6.71802	7.85197	21.413	14.2376	-3.11925	3.79034	16.1223	8.76161	23.5218	49.4277	69.2741	20.5669	44.5039	69.109	91.6883	207.752	227.245	614.798	610.43	1041.54	1661.72	7626.01	8946.22	14193.9	15570.1	8345.83	8711.99	9506.06
1.81548	4.19253	0.376294	-8.79847	14.9617	52.1384	11.6118	19.8184	19.8626	8.32938	9.61197	21.4004	22.9273	31.0911	54.0687	29.6813	74.4075	136.509	141.251	237.657	343.946	500.976	815.566	1408.89	5129.71	8283.01	13766.4	14099.7	10075.2	9954.85	10976.7
1.85272	7.88667	5.55197	3.1807	-0.294228	41.6982	-9.48629	5.72192	2.77591	6.9762	11.6551	-14.794	28.4389	46.6032	38.0216	61.28	38.4778	200.275	165.61	138.295	254.942	367.994	693.542	1028.82	3682.3	8635.08	10892.8	13510.3	12270.4	10837.7	11201.7
1.89034	1.51416	-1.23691	-1.55044	-1.8758	37.0983	7.81563	6.54739	12.6332	2.42288	-3.11512	24.1169	12.0375	2.50968	28.389	46.0866	83.9987	98.3132	169.098	162.661	250.998	249.859	695.001	968.388	2554.46	6409.36	8228.96	13976.4	11589.5	10289	10774.1
1.92834	8.93061	2.87408	5.4649	8.88264	51.8576	4.56934	-1.4108	18.9959	5.39832	13.8389	4.11563	34.0853	20.3691	43.2255	55.9523	54.3294	88.8435	151.173	237.221	303.208	354.416	730.093	753.22	2120.71	3814.78	8267.04	15005.8	11079.6	12332.3	11608.3
1.96671	-2.66961	8.25821	8.5374	11.494	13.9413	6.53931	0.88641	11.294	14.0636	-7.56734	13.1399	-2.2922	9.10389	29.4582	12.1486	74.9235	114.086	125.448	143.382	136.827	263.126	554.378	781.951	1870.87	2410.87	7876.11	11918.7	10061.1	13910.5	11687
2.00546	2.21833	15.487	-6.27807	-1.84601	53.0577	-1.80799	6.81551	-2.61625	17.5281	17.4292	1.84016	15.333	24.4487	41.599	34.0706	48.8037	94.5062	99.699	125.78	120.907	101.69	306.892	613.482	1579.99	2089.13	6013.61	9281.81	12027.8	15744.4	14432
2.04459	5.89454	-2.58033	2.63475	-5.08781	16.4284	14.8495	8.71191	12.2963	3.73396	-0.814925	2.28675	0.768505	24.2954	15.3678	26.7632	49.1254	109.055	133.672	201.491	106.968	189.167	432.259	451.84	1317.26	1531	3525.21	9099.29	12950.8	16170.3	14464.7
2.0841	4.0229	-11.9467	5.39546	8.42823	88.2831	-5.37015	7.80367	-1.30238	8.26312	14.9704	33.3391	-0.0471924	25.7814	18.3449	10.1653	55.0062	165.22	126.736	139.545	140.866	190.545	330.01	430.843	939.082	1422.56	2344.52	8276.61	10944	15996.1	14328.7
2.12399	-2.12491	8.08112	-11.3311	1.85865	-12.7403	6.12744	2.26011	-12.8395	-2.19916	5.54446	7.76607	-6.86423	19.0178	16.8282	7.81348	29.1729	85.0246	39.7673	126.858	115.904	139.073	233.096	497.228	905.932	1107.47	1371.86	5284.01	8471.36	15575.7	14868.9
2.16425	-3.82779	8.30383	18.3753	6.77201	66.1568	2.80987	24.8499	16.7866	8.31347	20.4084	15.2551	27.8366	18.0848	11.3265	34.9979	21.7994	27.708	85.3353	24.8592	164.113	160.741	173.398	187.939	806.946	652.477	1018.64	2786.16	7703.86	16508.7	14853.1
2.20489	4.57734	-5.20805	-4.80699	5.60768	45.8666	-2.55418	-2.95271	-1.9621	6.49398	22.6781	-2.80958	22.8473	18.6941	14.2739	20.4215	30.2865	21.7515	139.701	78.6304	133.463	141.455	123.75	225.504	674.415	731.851	1095.91	1690.75	6950.04	15664	15696.9
2.24591	5.62185	3.98805	1.01341	-8.68791	23.4323	3.49514	21.836	0.533672	-4.2484	-2.02778	0.0299877	16.7211	37.9477	40.6305	16.369	18.2661	43.3605	74.089	99.5201	87.8371	64.927	172.656	150.946	490.941	799.596	751.315	1070.98	4736.83	12362	15451.1
2.28731	0.779557	4.45856	-0.232058	17.5188	59.0775	-3.31531	9.89983	7.47516	4.64695	0.0443372	16.6013	15.509	4.42956	3.69476	5.88759	42.7376	71.752	76.594	158.685	86.5149	163.671	106.801	165.972	315.44	633.702	623.687	1026.72	2354.52	10146.8	14441.8
2.32909	-7.45071	1.81922	11.7849	2.48518	58.4058	8.67181	-6.83665	7.48693	2.68083	2.30749	4.85063	17.838	-2.04488	29.0785	11.7066	14.347	91.5481	110.427	135.937	98.9578	95.0192	190.72	152.237	281.138	506.026	534.709	676.622	829.943	9228.12	14595
2.37124	0.42434	6.80619	-7.51911	-1.10905	-3.67819	-1.82449	1.55663	2.28189	-6.53609	16.2999	5.47501	-5.0124	6.55357	-0.129243	11.5142	45.635	93.1649	79.4338	71.0431	54.9123	79.1255	154.298	178.362	300.191	388.477	399.34	651.587	506.415	7063.25	13132.3
2.41378	-2.62713	4.52067	0.0148538	-5.96548	136.962	9.12236	1.998	8.5827	16.9764	7.97081	6.69718	6.42836	13.1889	21.3983	33.8713	34.5459	76.7108	67.8183	11.2573	67.3766	22.827	81.4257	100.637	279.656	190.698	471.129	669.677	388.084	3943.85	11110.8
2.45669	3.77713	15.7274	-3.60584	5.04967	-24.3788	2.44307	-6.89354	6.32512	4.46857	11.4083	5.98524	12.6593	31.2942	13.6607	17.8939	19.2102	98.0766	23.1386	47.0433	111.032	47.5869	106.393	120.785	234.606	121.709	384.781	433.97	400.418	1426.43	8233.58
2.49998	4.44083	1.85955	2.84838	-1.16022	67.648	-1.22088	12.2297	7.68033	19.5601	-18.0153	-10.6599	13.6758	-7.25567	20.9425	-2.83356	20.2813	59.5684	72.5881	101.091	47.6616	56.5788	108.519	170.89	183.673	134.976	196.931	318.383	205.47	514.822	7626.43
2.54364	3.52742	-5.55067	-5.84102	6.18575	70.1095	13.998	15.9078	-0.287025	6.03525	1.82444	22.6803	10.5932	-6.74013	-10.5453	17.886	17.622	5.88967	89.809	83.9612	86.7761	75.4615	160.866	57.1321	144.211	111.108	157.968	278.831	134.032	425.213	4663.41
2.58769	-0.362664	5.6942	6.51022	9.18236	-10.2599	4.50191	-14.158	6.72183	5.72308	11.4615	14.9572	10.7223	13.2838	29.4391	16.9455	29.1457	59.9717	45.3296	42.7774	57.3206	68.7114	123.949	109.881	150.323	209.098	278.924	228.916	192.05	209.243	1744.51
2.63211	6.26513	-3.80423	3.33336	-2.03974	78.7707	1.63949	3.03624	10.6386	3.92668	13.4919	6.0718	-11.2613	21.8325	3.22687	0.0352566	5.76648	51.2698	106.157	44.2773	24.7618	116.356	30.3537	81.6381	141.95	169.276	122.95	297.408	109.859	236.287	695.399
2.67691	2.10048	0.74361	-0.213203	-1.62829	59.8874	10.6339	5.6764	-6.89222	5.9126	7.47324	13.7505	3.17715	3.36103	4.68334	9.99243	5.62487	33.4731	41.5328	22.1211	47.802	56.867	30.1354	78.0954	141.141	170.518	135.436	159.566	88.72	210.165	496.584
2.72209	-1.32421	-7.95462	9.81465	4.40651	15.6674	5.92195	-11.5205	6.27781	-6.41444	4.24214	-0.897677	7.62399	11.5898	9.82653	-4.04635	16.5473	30.0664	40.889	138.057	67.7566	84.3378	101.488	62.8019	132.228	39.9005	121.625	186.618	29.4206	199.372	296.478
2.76765	1.81921	-1.71565	5.67277	-0.551037	64.0115	-5.18909	15.2336	2.38845	2.79211	1.73313	-6.21841	-0.0204291	9.36257	24.8022	19.0396	16.2389	0.919276	54.2395	49.1056	26.5124	30.6417	82.1257	67.5862	117.368	89.1283	118.195	106.873	170.514	-2.2921	269.139
2.81358	-6.26781	1.1397	2.00911	4.96335	59.4898	7.09924	9.5761	2.84397	18.1627	-5.14778	6.74217	14.814	-5.37981	1.56456	18.0609	-1.20799	30.9313	53.9389	33.2534	30.5834	58.4225	59.0353	44.1156	39.0559	183.49	114.789	38.5919	101.821	94.1316	-140.765
2.8599	5.82842	6.14013	3.48792	6.80227	36.4667	9.36835	10.325	2.08659	9.1185	21.5587	9.01033	10.1124	7.17878	-2.9873	-3.6993	14.2175	88.9582	19.0382	47.3879	75.5778	44.4437	62.8547	49.3665	149.157	109.535	92.518	243.056	78.9184	53.9436	143.869
2.90659	-0.292013	1.74719	-4.06634	-4.13961	63.5656	4.54994	7.78386	-4.17099	-4.22905	-2.30726	3.30961	13.1245	-6.17914	15.465	17.4595	16.1403	35.7431	18.2238	89.0114	39.7354	73.5066	52.5144	4.04111	190.61	42.6749	73.3366	149.994	90.4821	45.533	68.7686
2.95366	3.92732	11.4884	7.60396	10.583	50.7824	0.675567	-0.250442	9.29905	8.99104	14.6234	-6.44924	-1.14951	6.34727	14.5946	8.06191	25.5623	-10.6092	10.3601	83.2177	32.5495	19.8258	78.8717	80.3612	99.9831	95.7366	18.8663	-39.3878	-20.6153	171.542	179.132
3.00111	-4.50246	2.47273	3.42624	-2.05541	60.0952	-0.509061	-15.9289	-20.6707	8.64269	-8.37665	15.9068	10.9586	23.6755	3.6365	12.7587	16.5339	45.3331	90.1483	42.3665	26.8257	52.7401	64.9576	36	96.6687	224.207	98.3484	43.7965	-1.23321	121.18	107.778
3.04893	-11.1493	2.65396	-1.51003	5.1261	22.7341	-2.13443	9.23973	16.8674	2.43343	0.976824	9.91859	12.095	1.1998	-2.52992	30.4124	3.82432	37.0824	42.2032	13.3262	75.692	55.7011	113.59	57.9826	59.8005	72.2636	192.757	10.4626	48.3282	-5.09046	165.156
3.09714	11.3999	-0.925511	-1.79376	-0.964914	77.3772	-0.124769	13.3493	6.19699	2.38195	4.05938	-6.36328	16.7973	-2.11114	1.33372	6.63659	-1.03212	18.5099	28.3579	0.969158	24.9249	42.0187	4.75003	42.2816	122.377	46.7897	169.571	177.355	59.1528	102.862	19.7118
3.14572	3.64695	2.47171	-3.35109	0.265081	31.0762	2.6474	-0.126924	5.12382	-6.21955	-15.3224	18.9151	-0.97492	-0.319906	13.9027	-13.7337	-0.509296	13.4217	51.2951	32.8498	60.6328	130.097	34.8356	-1.09942	67.919	97.054	-10.9255	132.91	102.369	82.3304	337.702
3.19468	1.04831	-2.76273	5.90184	4.29334	61.3484	11.7091	4.42516	9.46277	3.08716	10.5614	-6.00454	-1.50726	15.9044	6.28947	9.3457	5.41386	50.1541	36.1396	51.7616	36.485	18.0543	124.712	83.3891	88.0802	-8.86748	18.7883	-8.98574	43.2988	155.59	63.5577
3.24402	3.51228	2.93849	-0.707729	-3.99485	38.3105	3.65737	-3.65105	-1.5222	9.07102	8.81686	9.42645	-9.06166	0.563596	33.6557	-1.08028	29.5227	25.2867	65.4703	-20.5556	77.414	31.4752	37.3026	98.5905	93.5548	10.9537	15.3779	70.6133	-75.4484	-73.3514	-145.889
3.29373	3.4723	1.42831	0.691771	3.65752	54.1389	-4.88753	7.58246	6.5693	8.0272	-1.78602	-6.76655	16.3133	7.41877	-7.11214	14.8517	0.312504	11.1102	23.7295	46.4218	-5.55251	-6.884	34.201	135.904	68.8924	26.586	-8.18714	55.347	-18.1316	-6.13589	-300.803
3.34383	8.1211	6.30802	2.39608	0.854214	23.5931	-0.0598123	-11.2743	5.82412	-6.41956	9.98426	16.5982	2.48641	21.2579	11.8203	-2.72735	2.29645	126.47	12.8016	57.4447	52.5587	44.1648	42.264	36.3702	36.8354	109.551	85.6757	100.898	36.0845	19.3717	188.691
3.3943	0.874706	1.29205	-0.413069	-4.94873	96.5749	6.91897	13.1498	8.65032	9.2566	20.62	-1.14728	17.4517	6.0009	-11.878	16.0241	-8.34278	23.1545	3.5115	35.5309	20.7803	25.4924	60.9148	21.4222	29.6926	130.296	118.817	69.9174	31.5523	-42.7302	66.3099
3.44515	1.41729	6.20249	-0.70026	-0.776691	10.1305	1.94676	7.46412	-10.0685	1.89291	-7.8885	2.93122	4.21149	-5.18479	12.3603	1.16243	16.2899	2.74655	14.1609	49.6723	-1.81315	-4.92034	49.8542	40.641	23.6963	43.8119	110.595	114.963	58.1158	-78.6575	115.74
3.49638	0.213689	4.18111	0.655633	-7.05659	81.7832	-12.7545	3.1624	1.63309	9.83215	4.47653	-0.0705483	-12.8258	14.3205	21.1478	3.67161	9.44796	-33.3488	33.5083	31.5054	14.9123	50.127	2.91367	46.6129	65.7197	76.3559	33.8493	-35.4707	72.7965	232.693	101.303
3.54798	1.17821	2.61762	-1.71484	2.86416	41.35	6.30198	3.53874	7.73052	-2.3551	13.6626	-2.8016	10.7554	-2.53337	-23.4819	10.929	29.1097	-0.815129	18.2107	17.6224	22.413	48.3743	-13.475	30.5361	48.7323	-28.8532	6.72975	85.3339	68.1464	36.8578	84.519
3.59997	7.33736	-4.45117	5.04581	10.7457	91.6271	6.16897	0.249292	7.88268	9.55277	1.76734	12.4001	20.9543	11.125	25.8542	16.3699	-12.1085	36.3754	26.8208	20.109	42.5162	11.3069	10.7907	7.86921	93.8743	57.1478	66.4307	40.7258	-18.7216	-53.2535	164.998
3.65233	3.1833	-0.210875	-3.16804	1.68959	12.8925	1.41661	7.25724	0.49768	13.0513	8.42807	-2.29366	-5.79543	1.45607	17.0736	-6.86843	-5.78806	52.917	9.91344	39.9468	47.5523	12.4654	84.4239	-13.405	6.21434	74.0645	66.2441	-27.8046	48.7965	-60.6837	73.8534
3.70507	-0.760227	5.13702	-1.99707	1.07804	92.9085	-13.1409	-4.62807	-5.85767	-3.30276	9.54179	1.51814	3.50343	-2.70835	-4.70431	29.3774	6.38419	49.0827	72.6949	76.8047	80.4896	2.57763	52.6948	23.6715	-15.5915	-12.4623	99.6185	-22.3106	-26.3016	57.8952	204.576
3.75819	-4.54643	7.28307	7.84804	4.46813	24.4875	-4.98428	11.5022	18.9355	5.60247	5.97705	7.96422	5.03774	0.178869	-4.76647	-12.9781	4.67436	11.2327	61.4358	-4.69494	5.09238	86.5286	5.47055	7.6996	93.6795	23.5655	29.8985	69.4912	41.07	-39.2206	-15.1463
3.81168	-3.30408	-9.52621	4.34528	-6.94759	102.549	9.5181	8.24516	-1.09132	-9.59779	8.89999	3.39866	-0.218759	11.9522	-1.94353	14.0636	11.3173	41.2834	54.7459	27.903	45.2408	4.20022	56.6685	41.4731	-5.15004	49.9661	17.5713	69.2587	28.4693	-46.2471	173.973
3.86556	8.46842	8.99372	-1.8897	4.55107	26.4426	20.4809	-14.0902	-2.89067	-1.28787	-6.29489	-10.9619	-4.78751	14.5866	23.6933	-0.0142287	25.6149	32.8478	-12.9477	16.2054	6.0714	35.6304	32.1423	100.449	129.176	46.8859	-2.73846	-40.4653	41.1089	7.24944	48.0256
3.91981	-6.84599	1.25525	-3.73538	1.02376	81.9509	1.72399	12.8636	4.93021	0.712196	-1.95178	5.23141	-1.08768	21.4945	3.70516	10.981	1.7033	7.36768	-18.4274	50.7337	1.09294	44.3302	54.6778	62.3754	95.8693	41.9783	61.4179	51.9452	60.0747	27.011	41.8672
3.97444	3.54313	4.91344	9.02944	5.83209	65.3551	-5.77467	6.08888	4.39363	4.48458	2.4505	8.20052	-3.51492	-5.13493	11.4531	11.8301	-0.909318	-0.326666	57.7464	73.7496	44.8217	-11.5044	34.4797	-9.54018	47.7768	69.4513	40.3469	9.01274	-8.09311	21.3165	-321.982
4.02945	-0.559964	10.9642	2.61365	-1.80955	52.3911	-6.45597	5.72191	-1.75457	6.36087	6.03454	14.9357	16.0238	-5.43807	-6.64285	15.1974	15.6847	-5.5262	28.1131	54.0931	78.4101	-33.296	54.5392	7.82298	52.9939	1.09983	4.62207	100.347	-55.5649	0.46764	-17.8097
4.08484	3.56444	-4.53426	-5.6077	0.515195	62.4518	10.769	-4.37409	15.6919	-0.0665575	2.67874	3.23097	10.0558	-0.215498	4.6364	3.80059	20.0076	23.7129	8.51285	30.1525	10.5503	43.4909	25.6567	46.887	62.1175	-7.49564	67.6369	68.2792	87.5087	10.0094	278.258
4.1406	5.71767	-2.38826	2.07302	-1.0205	49.1533	10.3635	4.8591	11.7745	18.8221	11.7887	-2.54867	0.794998	23.2988	8.88828	8.35019	9.3299	23.3925	28.7044	-1.75366	34.8309	26.6538	52.1507	39.1068	-26.0389	75.5374	39.9051	64.6644	105.427	183.673	5.80751
4.19675	8.80725	6.02915	5.45102	1.09152	73.9427	-8.53619	-11.2845	-3.36541	2.65392	0.232656	4.47233	0.365625	9.90198	2.46602	-11.8753	13.7199	-13.358	33.5114	31.9979	34.8149	37.9305	16.5222	50.8284	12.8272	31.3639	44.207	-31.3195	19.7962	65.8981	-46.1259
4.25327	-4.47561	1.56351	8.20089	-11.7715	66.0807	7.10382	16.1873	-16.4292	-7.09664	-0.590223	-4.96942	8.01047	-7.73209	10.6077	6.40345	8.55274	28.6399	39.4681	52.728	-20.9931	74.0302	-24.5604	48.2907	69.141	58.0363	112.319	52.5136	13.8135	38.341	4.84583
4.31017	0.6673	-2.12468	-6.10061	15.2287	34.4032	7.43909	17.3836	5.56935	-1.20348	5.31916	12.2219	17.2769	-7.25156	-2.73288	14.4025	-5.64585	49.5193	5.8144	66.9516	-36.0237	11.4926	56.1629	38.0577	-16.5014	14.9239	49.0274	88.3072	-0.191703	-103.004	5.42094
4.36745	6.01498	-0.37558	2.75734	-0.94151	80.0542	-7.61421	6.57504	19.0038	10.3704	-5.37714	8.38223	-10.3119	15.8658	-8.42264	12.0733	-11.098	-44.132	27.0998	-23.458	24.5819	28.0716	60.5377	-14.5331	23.4823	-2.10391	15.2871	113.022	35.5303	85.8386	-259.562
4.4251	-0.0246614	8.68713	6.58209	6.52811	67.4438	-0.956642	1.05527	-1.34645	-4.41152	6.67347	1.48934	18.1793	-2.61977	16.9152	2.15505	8.70416	24.4839	36.5829	-6.29291	47.4382	31.6575	-25.1312	-13.0282	51.8655	36.706	25.0759	92.2423	-28.7474	7.23313	187.11
4.48313	3.97348	-5.2943	-4.269	0.165971	47.8817	-2.21106	5.89755	3.31998	8.08441	-5.80495	-7.66021	12.8717	-0.0551239	4.81498	-6.57135	1.81633	61.2381	48.5396	-4.90028	20.6907	19.8672	-9.2809	46.8993	65.6573	28.3214	56.7259	146.025	55.3695	-68.1264	629.096
4.54155	-6.8255	8.36692	-2.76921	0.269154	83.0632	-3.44062	-0.316827	-7.0503	-9.82871	10.2303	-5.38952	3.35099	34.7472	11.2265	11.5499	3.95052	25.0781	28.4969	0.574574	53.625	28.8479	85.1029	38.7355	72.997	3.59188	23.4531	148.062	15.5667	122.832	-69.6135
4.60034	4.34143	-0.68394	-5.13276	2.31237	76.2383	7.6317	-3.54549	15.32	-4.5538	-14.7494	3.54982	3.39822	-9.64923	14.8342	5.88713	6.51582	17.4582	-2.74629	49.6231	13.2568	57.1747	69.8323	-3.41579	49.261	38.0117	16.4395	-41.3421	9.06977	134.84	-13.8759
4.6595	-1.3044	-2.29856	4.08315	1.08383	67.41	0.657227	5.94917	5.13962	11.9477	19.2813	2.7803	2.87373	6.6747	-5.12941	-2.44762	6.4628	9.1947	25.0243	24.6192	48.8811	12.9127	43.0002	-12.4679	64.6145	59.42	-69.2961	42.6782	109.638	52.9651	287.803
4.71905	0.120208	-1.16941	3.65899	3.29607	48.6476	5.4039	-2.96754	-4.86737	16.0103	7.99294	-3.06109	16.8084	11.6657	2.79721	11.0068	9.42179	-4.16705	0.478333	-7.27742	16.4328	34.3924	33.4688	44.6752	62.3171	14.6745	50.2021	19.6985	155.339	192.594	128.185
4.77897	-2.7649	5.64238	0.377725	1.39517	91.4197	-0.678166	10.8306	1.91515	0.0720965	-8.44406	10.5496	3.6953	1.51831	4.64461	-16.6806	-8.14115	2.72602	31.0886	20.7096	23.3087	5.9752	-2.56129	30.0852	62.1245	77.2249	99.332	164.81	-72.9223	177.405	81.3237
4.83927	-4.4313	2.0427	8.18967	-9.16214	27.9785	11.5035	-9.9675	-2.24745	9.97584	8.45721	9.12601	4.29828	0.960208	5.84252	2.06107	-3.10616	-8.76943	8.89035	10.0385	50.3014	-32.9118	-15.734	41.3521	11.8059	57.8635	57.4441	202.08	-5.24887	145.385	-179.314
4.89995	0.128746	1.75644	-4.53076	-1.00835	92.2608	0.176766	1.85037	5.56497	-10.8284	1.06337	-6.30587	1.62288	-1.66665	0.48473	22.1021	5.36576	18.3028	10.9878	21.789	-32.9184	16.1635	10.1207	29.4541	59.2091	-6.00591	-1.20131	231.743	79.6664	170.447	-11.2652
4.96101	4.45672	2.30065	-1.76885	-1.57342	82.1515	-1.86707	8.2512	1.02199	5.76658	4.32084	16.5614	-0.228281	1.08491	9.3861	10.5627	15.1025	53.6063	6.69055	5.33012	5.68489	87.7828	8.58782	6.02158	15.948	0.572669	79.5224	75.0868	25.405	108.802	-22.0709
5.02245	0.0102435	4.52492	4.77277	6.70906	34.0789	12.5869	0.522148	11.728	8.26583	13.5861	13.07	6.05195	17.2376	8.55043	2.10878	10.8714	15.906	56.2969	-27.8039	3.14549	-11.0952	27.5286	92.2598	28.6833	116.535	83.4057	121.595	39.9782	-28.9913	-190.865
5.08426	-6.421	-3.9688	7.71845	4.4269	102.762	11.6326	-6.10061	6.85577	0.322682	1.96166	2.08644	5.19781	0.39705	-0.234926	1.56636	18.7139	56.9605	15.8127	10.2887	33.2229	13.7107	-16.6362	96.1554	44.6766	56.0594	36.167	228.142	15.8068	86.1664	247.713
5.14645	5.26005	-0.264903	-2.56772	2.8306	82.4142	0.78834	3.55947	-2.37448	2.19151	-1.07329	-2.0471	-16.1758	4.33557	14.3997	18.2268	-6.0842	13.721	-40.2496	46.1298	23.1122	39.0851	16.9235	105.772	37.3554	-16.1223	32.5201	146.918	25.1513	-2.71232	59.1712
5.20903	-1.11874	6.22647	-1.21908	4.14103	38.4585	-7.11992	11.6965	2.65183	4.26883	4.1732	2.24743	13.9444	13.185	-6.34206	5.32601	20.1684	22.6032	18.6001	69.5186	10.4756	17.159	47.8081	8.70184	63.1938	2.74006	17.3205	172.856	57.9948	10.6171	161.566
5.27197	1.86401	5.23197	-1.92848	5.04868	114.453	9.45495	8.66533	0.736727	4.99389	5.22841	4.94831	23.393	-10.8625	1.59161	-2.59332	4.28583	7.72431	74.7378	3.99287	45.8368	-8.97773	89.8956	32.3072	31.7816	96.212	30.4543	202.767	109.386	190.821	-208.102
5.3353	-2.81377	-2.28611	11.2667	1.27584	43.931	-16.2955	-5.64227	-2.89322	7.54453	0.895282	-5.57352	-14.8762	3.87653	-2.64785	-4.76669	24.8932	48.9904	22.9891	38.856	28.3633	-39.3941	53.454	40.3846	36.4247	38.7653	29.6076	281.373	44.7638	68.7512	-63.857
5.399	2.18757	-0.802006	-6.20011	7.04534	78.6708	10.8596	-4.73449	-4.36966	-4.44346	-7.10543	13.6855	10.5113	4.80644	18.204	15.2812	-1.80146	-35.3131	6.40774	-7.04979	40.9784	16.8729	7.85405	-0.773908	-3.05988	-17.8637	87.2196	240.906	83.9105	-57.7643	150.573
5.46309	6.08577	1.5809	-2.60352	-2.02724	84.8719	6.53587	1.44597	1.61711	-10.1973	-10.0691	5.22102	11.1261	3.4412	-0.428809	4.40216	-5.01929	13.7076	-0.341391	7.93422	2.23731	19.9369	12.8072	-31.3678	37.9265	28.8593	87.2178	151.556	11.819	121.521	191.525
5.52755	7.53538	-2.59169	6.34505	-2.24658	71.7758	6.18305	8.19089	2.82057	12.4946	3.51411	3.87991	-5.43038	3.87098	0.316122	8.19051	21.9845	57.734	53.6972	-5.98432	45.9506	14.8558	37.1838	19.8072	12.4084	26.8063	87.1556	92.4594	69.5172	34.0689	22.9946
5.59239	1.71868	8.50085	5.04985	7.93883	57.0674	-5.01554	8.44264	-2.15851	3.59481	17.0256	-0.0525936	2.38154	10.897	-1.20257	5.57617	-1.65413	22.6073	52.0225	29.5285	87.1628	26.8495	26.7008	-16.917	34.8627	64.8728	10.2858	123.844	96.0206	-204.436	407.022
5.6576	-2.608	0.537609	-0.859847	-2.07003	118.274	11.6172	5.90905	11.8588	8.03263	-4.1812	-6.28853	-1.52538	2.60867	4.98116	-8.71759	4.64643	38.8965	28.6342	63.3249	59.9055	21.1372	18.8226	7.15264	28.6769	18.7962	15.4049	136.683	99.2119	124.281	249.496
5.7232	9.25873	5.42539	6.21701	-1.41848	48.7252	9.51025	-3.6517	6.61607	1.39072	7.18539	13.6386	-6.98329	-7.14645	-0.216601	11.763	5.81993	-17.9417	-34.8729	84.7101	20.0158	15.6973	-1.68959	74.437	26.5817	25.2681	23.0449	136.708	172.908	182.28	-186.024
5.78917	-6.0489	4.55383	4.10611	7.90728	109.677	3.46861	-5.69893	-4.43349	4.5781	-7.34077	-11.8939	20.6454	6.78444	1.33311	8.88274	2.04092	19.8104	40.2016	52.443	-15.2987	17.0483	14.566	71.175	-2.85877	5.53667	24.3374	258.827	122.969	183.258	115.78
5.85552	4.15948	-5.50734	-5.12379	-4.96274	104.087	1.22943	4.65547	-4.90874	3.94178	1.31958	17.7173	6.91973	6.77044	11.5031	-4.45137	8.94632	28.6074	-11.3249	3.91011	-26.5515	58.643	36.7911	34.1022	60.7143	55.8241	31.95	209.659	57.0021	149.155	515.06
5.92225	0.493319	-0.383319	3.42216	-1.59064	48.4219	-4.75006	9.90507	2.91121	-3.414	12.683	-2.87069	-2.26396	6.1719	-1.55428	-7.11311	-3.00517	6.68602	30.6546	-13.3552	18.9642	36.7995	47.7418	20.2375	101.825	46.0632	28.3843	51.8722	56.4223	114.532	7.11774
5.98936	2.02132	2.63171	2.66233	16.3805	92.5995	-6.817	10.6066	-0.473457	14.5996	9.87594	4.18974	3.40979	10.5734	17.5778	7.98086	-5.35358	57.2073	64.2142	10.2136	-6.57447	26.8694	-9.60524	-8.16058	18.2235	65.2956	6.85552	115.1	50.9296	-144.669	197.098
6.05684	3.67372	3.79886	5.76356	-3.33569	90.7024	19.4342	12.6666	13.0132	-2.24722	-6.57339	5.46761	9.61498	-6.621	-5.36852	26.882	11.4654	16.2607	-0.998691	37.7563	16.7413	63.2387	29.3902	22.4413	14.5443	34.6907	89.6497	224.043	61.0494	237.939	291.884
6.12471	-1.77237	8.66889	-2.92711	-1.52856	76.8147	0.767145	12.6463	8.92825	4.63845	10.3353	4.54519	-12.1507	6.40902	19.6934	2.70062	-2.19378	-3.99276	-22.5385	35.3171	38.3405	-4.5431	3.64764	25.1623	83.1377	3.96237	28.6519	132.219	29.8903	69.8803	219.617
6.19295	3.86355	-0.286328	-4.23145	-3.05661	77.0223	3.54614	-0.448386	-4.6181	13.1104	7.60785	8.83685	10.6282	12.4049	-2.20302	9.51427	2.94179	-3.43762	16.4128	22.8803	16.6981	-9.37284	-20.2261	37.3091	51.3227	46.149	88.5033	207.129	217.514	246.112	99.7502
6.26157	-5.62058	-1.73821	-5.42203	9.13625	103.418	4.54745	3.36313	7.34225	-5.6815	8.69317	-7.16584	6.74799	-13.2717	18.242	3.5605	7.37954	12.4015	48.5892	7.26884	5.41723	-13.4506	-6.13199	12.86	92.5433	-21.102	78.0706	211.71	25.0762	63.1699	219.04
6.33056	3.92222	4.79899	3.55476	0.64156	81.801	-7.35983	0.0190772	3.05198	9.67842	-3.29241	7.6504	7.8975	20.1417	19.6003	-10.6448	2.08101	20.7766	26.7778	12.7052	-5.89743	5.34759	65.4323	27.9843	-9.63895	24.3702	5.77757	169.925	84.4462	94.5457	-92.0664
6.39994	3.59032	1.51958	5.0821	-9.27419	107.996	4.85075	-0.324356	4.4663	-15.0328	7.89253	-1.52301	11.4309	-2.8068	9.35213	8.38826	19.5028	-16.5482	10.7347	28.5236	28.1746	48.0605	55.1858	43.6692	39.7826	34.0168	89.6547	151.294	140.001	80.4816	488.342
6.46969	4.7467	0.485418	-4.79943	6.286	86.3158	0.221856	-1.43153	-0.864432	18.0219	-2.42595	3.84114	2.34994	18.8886	-0.681627	-5.2633	11.6048	-16.6527	7.90003	11.249	4.32292	23.9831	7.81339	-8.38624	33.8405	67.6416	63.6576	194.805	32.0991	225.003	197.219
6.53983	0.57834	-3.13863	1.1087	3.15627	76.8195	-7.32305	5.16639	5.8196	-7.11613	4.5349	2.23236	-5.33213	0.273394	1.34072	18.0215	0.864048	50.6335	52.5301	11.008	15.4579	28.9385	13.4774	26.8769	21.1282	78.6974	7.70014	183.308	127.999	135.462	44.6284
6.61034	3.25524	2.70791	-0.841711	-1.20107	101.667	4.08486	10.7517	5.35996	-5.35438	1.95167	3.3619	8.55404	-5.46175	11.3897	4.47789	4.83416	34.6149	2.33786	21.6563	38.5944	0.041879	56.4569	39.2061	39.9742	54.5423	51.5774	238.584	70.8305	33.9317	310.121
6.68122	2.53417	0.964618	6.62092	-3.11204	113.71	-3.30685	-1.87427	1.95194	-2.25029	1.21588	15.134	2.12961	24.5506	7.13612	-2.58459	11.0929	39.7964	52.1737	20.9211	90.879	-4.33367	34.2018	14.548	31.2645	72.3486	61.1033	155.098	18.4454	175.699	283.458
6.75249	-1.1383	1.85826	2.68758	-0.971574	119.493	13.5959	4.85199	-1.69555	1.39271	5.15954	3.34955	-0.474488	-7.79802	-3.82402	1.89762	5.54191	2.88093	36.7263	10.1669	9.7547	29.5491	49.1767	-6.79321	73.4182	17.1362	75.3549	230.212	145.42	339.897	-154.404
6.82413	-2.13406	10.3017	-0.997131	-8.62011	58.4148	3.5641	8.99693	11.7485	13.994	-2.17679	-5.66012	12.0109	24.9831	21.4462	19.5754	17.7794	54.596	10.0269	10.84	1.42509	16.8945	23.3002	12.554	44.918	92.5029	66.5807	132.243	92.7515	321.466	547.687
6.89615	-1.40686	-3.63687	8.72438	5.88816	129.768	5.01275	4.02529	-3.12054	-9.6549	7.72042	8.16819	7.66352	3.1705	12.4974	-7.65036	-6.90471	15.1205	0.242703	-39.6402	1.04448	38.1763	30.3117	48.9601	66.2136	-4.36333	55.7925	204.608	56.1193	-101.353	156.686
6.96855	-5.82402	3.12802	-4.58677	-2.41662	92.6593	-13.7674	8.24244	-10.1403	-3.95545	-0.240511	10.4213	-10.7584	-5.19132	6.3927	13.8827	0.658587	7.50399	30.0671	42.3588	13.5063	49.7947	-3.49655	2.46363	8.38184	20.7609	11.2834	237.503	-6.12948	129.209	671.416
7.04133	3.24303	-7.35389	-0.42062	14.1856	112.695	12.7307	1.05081	-4.81215	18.3865	0.980717	2.50576	10.3263	9.63265	3.72937	4.43658	1.50631	0.144369	35.4188	43.3108	16.2233	-5.81026	10.3009	74.7767	34.7871	28.3637	-5.70244	95.1547	59.4458	179.491	179.347
7.11449	9.75304	0.267612	4.16294	4.55487	95.8367	0.896893	-14.0865	13.2394	2.90741	1.07679	2.12683	-2.61508	-2.09892	5.01176	-1.36061	8.87586	-4.04966	20.4325	21.3045	80.4798	24.5011	29.8835	109.249	49.9527	64.2846	106.229	122.098	37.2395	-5.9811	296.298
7.18802	0.344523	-1.63464	3.68749	-3.46667	99.7298	8.78603	18.6476	2.7453	15.1736	-2.87569	13.3689	-1.85899	4.10639	-3.53534	-0.44725	13.9558	41.5134	50.7742	19.8487	55.1311	48.0422	29.8152	40.6983	-9.96026	59.2361	112.601	186.224	-19.8728	339.754	185.753
7.26194	2.17428	1.06658	5.28864	0.804576	135.674	-5.72533	7.40529	7.39004	2.22266	2.47643	3.95185	0.935626	9.23751	21.4812	-1.38582	-4.43004	28.4056	-28.3403	10.4889	70.9353	49.2129	20.8006	13.2482	22.3739	9.30888	73.9674	182.231	187.679	79.8209	35.5324
7.33623	0.668423	17.5692	3.73264	2.21548	78.6116	3.42308	12.0532	6.6403	5.4903	-2.59515	1.969	6.21889	9.05663	11.2784	5.06008	16.8047	-10.031	39.0218	20.6315	-4.65536	14.3018	14.9948	80.0572	-24.1649	15.907	123.072	195.411	130.341	83.1374	552.431
7.41089	2.7675	0.53207	-4.74511	-0.163465	99.0625	10.2476	-9.32777	-7.92701	4.70562	-8.93581	-1.12833	-1.27908	9.67718	1.16042	17.0998	-2.98334	31.5719	65.0062	49.9689	2.16222	36.2164	32.4049	15.9932	72.7605	91.4764	69.441	174.796	42.6988	218.134	354.936
7.48594	-3.71477	-1.61173	2.5668	4.79307	150.77	-4.25251	12.1477	4.8455	4.2939	21.4825	9.69273	24.3968	9.04838	-11.4911	-2.45408	9.61085	18.557	32.9068	34.9805	42.3695	19.9406	-10.3195	8.30996	101.949	87.6751	69.8191	226.213	74.9978	35.6145	-27.4991
7.56137	3.18906	10.1668	-9.03799	2.11938	100.453	2.05406	-1.83081	-2.56453	8.22806	1.85278	8.31334	8.45014	0.913185	18.7233	24.5177	2.63943	3.2771	10.6643	19.4396	36.5798	43.4168	37.5268	10.8123	46.8413	80.7667	106.43	105.513	-36.237	434.427	-62.3693
7.63717	-4.68197	8.1742	7.13022	-6.12167	109.68	-1.34921	-1.84881	13.2546	-11.736	11.2386	3.44154	-10.4184	0.581364	12.3505	3.97195	-8.86761	46.7361	43.5171	34.3627	7.65273	-3.47599	52.1634	19.7085	46.285	71.7819	53.1469	119.919	66.724	-111.241	334.553
7.71335	-1.90791	1.39875	1.65851	15.8017	117.178	7.48621	0.843403	1.12783	4.13509	-1.09686	6.87153	9.50166	36.6162	12.3337	4.47997	7.33185	31.1332	7.35799	0.996881	25.3884	38.4448	43.2149	8.49888	27.101	32.4673	39.3655	233.744	40.741	324.605	262.149
7.78991	-6.21312	3.28959	-5.59481	4.14895	133.781	0.310317	8.62006	8.11327	5.71519	3.09815	8.52125	11.0535	-4.78587	8.28108	6.65855	15.2164	-14.4582	41.4193	27.5464	16.7217	56.8508	17.0749	17.5647	54.2193	33.3779	39.2835	276.937	146.817	208.604	165.058
7.86685	5.04574	-0.578055	5.62289	0.0406593	99.0572	5.76466	1.30348	7.21772	4.76693	8.43373	4.95746	0.723626	6.97461	-0.337917	-0.518949	24.7641	24.9466	40.8801	2.65762	33.1068	-8.93959	19.9237	107.372	47.3292	22.5572	58.7437	251.031	75.2756	139.048	-46.1337
7.94416	1.36882	9.32932	7.50706	0.466552	166.194	-0.980281	4.67641	-2.89226	-2.39689	4.10903	-2.51316	7.51894	6.0938	-0.499299	18.8742	-10.2004	45.4865	0.300957	-4.05488	6.0967	-9.8837	-9.13629	42.5214	90.7131	59.6388	45.0966	94.8544	24.2849	125.326	600.652
8.02185	3.49866	-4.01176	-1.00248	3.89201	69.855	11.0168	-0.746599	8.24328	-0.23033	1.18358	-3.79643	7.55135	7.69254	9.96041	-7.00749	7.74221	12.6087	16.3613	23.2722	31.5414	53.5982	52.5333	50.3148	65.4637	28.3179	30.1815	227.437	153.752	271.571	259.264
8.09992	5.762	5.79559	-2.78491	-0.719787	175.716	12.1258	16.3887	-3.19434	9.39164	0.23815	16.8304	19.0451	17.7664	12.2836	10.5185	11.9101	28.6072	19.4062	57.674	33.2591	60.2516	76.9633	68.4008	34.3434	92.8712	105.089	260.159	194.917	131.081	419.538
8.17837	1.45036	5.50571	8.51237	-3.79474	101.34	-3.30757	10.5658	10.2071	-3.03077	4.78823	7.75657	5.30482	7.7042	9.22722	6.16218	5.06754	15.247	18.144	43.8366	9.33296	13.5833	40.6858	13.6443	-2.89213	47.2566	50.2946	170.009	110.535	168.882	191.731
8.2572	1.64833	1.33155	3.09407	5.37542	150.018	0.188031	3.47322	12.7403	-2.14895	6.56411	-1.74305	-7.43453	15.2996	-7.42492	6.67291	11.625	-1.08519	-13.445	39.921	-14.9425	-8.63652	60.1518	6.24092	72.8018	53.4867	68.4487	177.984	125.837	207.4	319.22
8.33641	2.27244	-1.22902	-8.29454	3.24774	101.971	10.5672	2.86754	-8.85365	7.03032	-6.76786	2.01646	8.87565	-6.0836	24.6326	12.5797	6.21534	39.0644	29.9716	24.7054	62.2748	31.1377	24.2698	57.977	71.4551	61.2603	72.3419	146.459	36.1556	211.067	472.372
8.41599	5.88115	-0.53846	2.61292	5.67451	150.399	-1.28503	-3.09246	8.24008	9.47827	13.8486	6.52063	0.705585	-2.15187	1.19417	1.18533	-6.56372	17.3991	17.8649	11.3701	74.2741	52.5709	40.7193	20.9218	10.7285	94.336	7.73531	75.3564	95.4525	209.806	93.5712
8.49595	3.28662	5.22855	1.95923	5.01722	120.998	-5.22015	12.6055	7.92307	13.9202	1.50984	-6.35708	4.24165	16.0489	5.43554	24.6414	19.9969	23.8515	30.836	69.1113	16.387	24.0317	26.0286	12.9214	28.3587	65.5924	101.811	178.991	205.729	168.951	149.067
8.57629	-0.0937492	0.366631	0.0862498	-0.583129	171.578	-10.6328	12.0578	0.658901	-4.27901	-2.24532	17.3135	21.8992	9.09912	3.97509	-0.914393	-10.8004	47.6516	63.0285	73.8528	-7.53652	57.3038	17.6719	13.3873	91.547	14.5066	77.0382	208.646	72.7539	106.089	108.284
8.65701	4.54994	6.93977	3.04216	4.93902	95.2963	18.4317	1.555	-2.97513	-6.65848	16.1034	9.93231	7.36355	1.0451	20.1794	10.8739	28.086	34.1751	12.7815	70.1428	40.7969	4.86186	61.8205	12.9959	100.97	33.7169	11.4366	161.339	98.6602	208.667	268.245
8.7381	4.4849	0.765628	3.53062	0.465864	168.045	1.02124	15.777	-0.247371	17.1978	19.4267	2.00583	3.08991	27.2964	1.09975	0.850103	15.2385	24.5051	33.8645	-4.69995	17.0319	27.6428	54.7184	38.7748	30.4197	69.5106	99.5306	125.296	34.8876	140.696	359.117
8.81958	-3.58944	5.06796	7.46318	6.18662	135.466	9.73797	-1.92044	2.58128	6.70584	0.830522	4.85168	6.81507	7.97346	0.291473	11.7136	11.7459	-14.1477	-8.67785	37.4595	24.6348	26.5972	52.8818	37.6736	56.2189	82.4685	69.3809	234.725	67.5519	178.819	276.612
8.90143	-3.31413	7.4571	-5.07774	-1.37	145.584	2.08558	0.952605	5.37424	10.27	-7.38154	6.2758	-0.395759	21.0169	21.5276	5.57095	16.3875	23.5143	55.5487	19.9218	46.477	48.8149	30.0067	77.5743	70.9358	61.6915	48.3186	121.246	29.9216	39.8081	124.725
8.98366	9.87596	-1.12138	7.17032	-0.637066	166.462	6.49502	4.72441	11.3511	-4.04777	15.7853	-6.2628	-0.5104	-5.29196	-0.0219658	5.21655	-2.90941	65.4396	34.5851	10.3504	52.7142	11.0204	43.1497	9.03957	11.9531	32.6267	49.9068	70.0016	88.162	299.492	404.543
9.06627	6.20063	-5.26871	3.74652	5.47851	167.622	5.51571	1.00536	7.08449	22.4741	-0.905215	-0.66306	10.8548	23.7122	12.9004	17.1804	11.3204	46.0552	87.8925	53.3658	23.772	78.658	91.415	17.1074	55.6891	55.1151	133.319	144.951	37.9488	46.7663	284.508
9.14925	0.821805	13.7897	-11.4085	1.40734	127.226	0.380557	11.4554	2.79965	-0.438761	-3.70146	2.5694	-4.73969	-2.93116	-2.14307	6.18924	5.30575	38.7226	49.1419	70.1206	36.233	56.6111	22.3096	10.882	122.291	29.4079	56.385	121.524	106.969	275.848	420.996
9.23262	4.32419	8.63859	-3.93773	4.93435	193.925	8.65133	-0.64669	6.52223	12.1293	15.8754	7.12191	11.3409	9.31073	14.4405	-8.80937	21.027	19.6734	39.1286	37.3189	14.5816	73.0184	55.5961	-1.60296	72.9275	39.0621	1.01024	134.847	177.973	132.896	77.7001
9.31636	-0.649496	-1.79066	6.4025	-8.70941	141.691	-10.8359	24.7326	7.01224	-11.7011	2.85079	9.20988	30.4468	-5.39808	-0.576261	25.622	22.5372	50.1615	25.7358	83.808	38.1647	22.4668	50.9291	70.9912	88.7754	74.4351	20.4232	225.855	62.8813	158.516	265.47
9.40048	0.065683	-6.1985	11.4553	4.34425	175.785	4.58618	7.69852	2.449	11.0844	9.77333	1.81419	7.48496	3.47519	18.9726	2.97134	7.41482	66.1792	47.1202	46.3424	42.2445	1.69418	73.2906	36.3349	65.8472	98.1555	45.8036	211.067	87.8054	306.587	212.521
9.48498	6.25916	0.946722	0.313327	-1.35993	220.18	12.6676	8.76672	10.1659	9.18511	-1.30951	16.3389	5.438	17.6172	7.54834	16.79	16.8375	5.63741	59.8948	16.4125	68.949	28.1719	52.8998	72.0025	41.0599	131.482	102.831	197.608	75.1693	49.0328	287.025
9.56985	1.02181	5.7073	1.53314	10.1643	154.375	5.64298	2.74007	4.5052	1.99774	9.27776	5.91444	12.4509	0.362131	17.851	-0.739253	8.3761	23.6245	61.1562	20.1398	76.3035	25.1345	21.4784	70.1337	42.2547	49.6888	108.588	193.58	9.71656	130.511	322.492
9.65511	2.52712	10.0402	4.30524	2.18085	163.679	8.84016	7.90133	13.0211	7.07181	9.14846	9.66656	-0.000737646	21.6514	14.1815	11.905	-5.21658	43.2686	67.5717	16.5765	40.6094	21.4552	54.6234	36.5525	64.7552	24.8026	75.6468	106.554	135.162	227.769	196.606
9.74074	3.81721	0.704382	-0.273239	2.79864	208.39	-5.23768	0.324711	0.629237	10.2103	1.85904	-1.80291	12.9084	19.6263	-2.7188	23.2557	13.6211	89.8985	38.7347	33.7494	44.5972	34.7359	19.1277	80.7645	54.3368	116.92	95.6252	104.392	180.263	213.746	410.029
9.82675	4.28796	6.05781	-6.03283	-1.16497	203.811	1.71758	11.3296	12.0554	-3.61124	10.3981	12.8742	-5.69203	4.68143	11.0653	14.9478	2.07795	31.8285	93.2508	31.7004	46.0422	89.8836	45.2833	79.6486	128.498	79.3083	74.0428	136.987	49.6401	70.6056	427.172
9.91314	-3.80632	5.01315	4.43446	5.73457	207.567	-0.486031	7.35402	4.88754	10.4297	2.81696	0.0042206	20.3685	20.2488	9.01926	-0.309948	26.6672	-32.2566	72.1926	70.4852	49.8783	68.3099	9.28578	33.357	127.071	47.7637	136.159	147.363	105.36	151.714	129.194
9.99991	10.182	-3.68192	2.9058	5.87563	213.873	9.25613	7.66827	2.69359	10.1019	7.86369	6.90283	6.47572	10.8964	14.0521	20.5873	18.4056	-9.71408	35.04	63.8889	39.4257	50.0385	111.901	58.6588	59.0701	57.3527	91.7855	152.736	98.5088	250.854	354.53
10.0871	-2.84359	13.762	3.21807	8.02967	209.133	7.48799	5.33622	0.466324	5.72222	8.27937	12.4028	2.15614	16.2048	9.19669	15.3503	8.58591	90.2808	-6.29566	52.231	64.4413	56.3814	40.9896	20.6063	121.543	86.4185	114.94	169.69	96.5462	225.06	498.475
10.1746	4.7424	0.00815297	3.11555	3.33151	223.882	9.30679	-0.323686	1.14391	-1.78583	4.1435	16.209	13.2334	5.99442	21.9029	18.1178	15.3347	120.359	40.8694	90.8296	86.6691	96.6693	54.1511	75.8646	83.593	106.46	102.533	115.825	147.786	166.164	302.349
10.2625	-0.260185	9.66682	3.24708	0.486953	253.457	-3.88149	0.31812	6.20938	12.2036	3.71687	0.545731	-0.93376	7.15501	-3.1698	15.6569	23.5542	78.6485	107.583	54.3221	27.4288	50.4292	102.865	86.782	62.5675	108.272	36.9548	144.288	64.5738	112.591	135.247
10.3508	1.4404	-2.1856	7.34629	3.0379	214.708	10.7383	11.2957	12.8154	9.28977	4.20714	-1.06315	8.72888	13.7156	30.8195	4.27814	1.16105	60.4045	81.0187	66.4014	73.1986	20.1606	51.7467	107.986	118.39	69.079	98.4992	240.259	43.5999	121.268	427.074
10.4394	11.051	9.36208	2.50354	5.50917	260.623	7.43442	12.0715	11.2233	7.42603	15.1386	10.651	7.80693	19.4093	10.1185	30.8497	23.264	58.5493	65.5826	26.7645	93.2391	67.8197	60.9357	103.276	106.672	76.8018	43.2699	101.972	61.3384	115.251	351.57
10.5284	1.00979	1.27506	10.7021	8.80332	308.283	-1.19476	7.61522	18.0027	5.88937	0.904099	12.1218	11.6131	22.7525	25.7786	2.97072	11.1128	11.8755	51.544	37.6792	49.6153	97.2968	111.572	61.7754	140.694	93.206	127.549	117.82	134.898	115.131	379.804
10.6179	2.42278	0.761414	1.28879	12.4491	245.535	8.20944	10.4248	4.52387	10.7539	14.9685	14.5939	8.85415	13.7708	-8.09422	19.1523	19.2489	111.531	86.5926	77.0267	69.1495	97.9365	91.107	75.2413	136.816	93.7586	115.034	136.806	82.5261	204.177	435.145
10.7077	4.09596	7.48725	4.04986	-2.82871	311.64	5.37207	9.59816	-5.02844	1.87249	6.16896	12.9038	27.5544	11.3382	21.725	3.04514	22.5434	44.0593	108.907	104.656	48.8708	69.2875	84.2344	25.1673	89.3098	131.212	108.057	111.092	-2.83092	156.884	530.256
10.7978	4.68673	-4.45468	0.59684	4.5512	303.635	6.51214	15.2296	20.6374	9.38743	16.0778	22.293	37.5971	14.2386	18.5039	21.7388	16.0243	44.8752	107.884	82.0024	87.7086	98.2627	55.7777	58.7981	77.2719	73.856	50.685	105.597	174.034	179.421	163.893
10.8884	7.18017	6.12118	5.65564	-3.20754	370.26	6.87473	14.4125	3.84923	27.5291	17.5692	17.3863	8.37702	15.791	42.3796	29.9114	22.5709	103.842	145.086	124.784	119.838	71.7224	79.9141	83.1052	90.3222	117.3	134.257	164.295	85.3604	240.87	495.326
10.9793	-1.02254	5.09526	-0.375743	6.12248	330.619	8.26685	-4.97637	13.8396	9.88981	11.17	22.6954	20.8782	34.2818	15.9102	19.0549	26.7599	105.304	61.148	128.413	66.6641	73.5437	144.134	97.8791	171.551	139.609	161.01	194.583	108.057	191.68	246.578
11.0706	3.33466	20.0241	15.72	6.08776	512.419	22.2948	18.6627	11.607	22.1227	12.5131	12.4722	21.4504	19.3803	14.837	22.8373	35.7459	94.6241	100.826	122.753	107.592	163.202	136.872	179.946	307.194	163.507	191.43	242.298	167.885	290.412	334.305
11.1623	8.67792	4.56835	6.60084	8.26698	308.128	8.70392	10.3068	9.37709	19.5657	18.6002	1.5433	18.6438	29.877	24.6216	39.0112	6.14423	94.2177	126.504	74.3709	116.426	165.601	131.634	147.348	167.208	129.51	108.726	205.164	75.2993	229.35	335.041
11.2543	16.867	22.3649	11.5222	19.9341	834.512	14.4298	41.3378	31.1633	27.1516	25.1939	29.6858	44.3031	41.2352	53.9114	46.2317	68.1725	250.02	284.379	201.782	229.931	166.16	302.607	260.4	280.514	323.252	303.451	362.302	272.029	390.544	905.57
11.3468	1.28083	-2.14408	3.69127	6.77487	109.155	-1.64203	-9.41513	2.15222	4.52319	-7.55467	2.03244	6.98521	5.02889	17.1935	8.34141	15.9081	16.6673	15.7826	60.6582	22.2604	-19.9146	61.798	5.65116	7.70258	45.4862	71.199	46.6993	34.5234	31.4168	-33.6051
11.4396	37.1459	49.8138	28.7518	38.7943	2329.24	74.6331	99.8735	83.3393	79.5719	94.4239	102.8	108.508	140.354	163.381	136.901	159.378	646.599	690.73	711.164	629.142	634.97	830.016	824.076	1252.01	919.8	763.948	939.378	639.424	1155.16	2294.94
11.5328	0	0	0	0	0	0	0	0	0	0	0	0	0	0	0	0	0	0	0	0	0	0	0	0	0	0	0	0	0	0

## Sheet: PADs
eKE	2.06667	2.13793	2.21429	2.2963	2.38462	2.48	2.53061	2.58333	2.6383	2.69565	2.75556	2.81818	2.88372	2.95238	3.02439	3.1	3.10008	3.17949	3.26316	3.35135	3.44444	3.54286	3.64706	3.75758	3.875	4	4.13333	4.27586	4.42857	4.59259
0	0	0	0	0	0	0	0	0	0	0	0	0	0	0	0	0	0	0	0	0	0	0	0	0	0	0	0	0	0	0
0.000189034	0.026282	-0.030448	-0.014555	0.041135	0.036228	-0.009277	-0.158452	-0.130381	-0.522208	-0.234851	-0.095461	-0.082642	-0.12179	0.006416	-0.105114	-0.018348	-0.036147	-0.031873	-0.190268	-0.139888	-0.055025	-0.156091	0.20865	0.169195	-0.11753	-0.154045	-0.023473	-0.135545	0.525303	-0.909376
0.000756137	0.354499	0.114678	1.18752	0.266846	0.32786	0.338644	0.35432	0.404746	-0.007786	0.277585	0.305002	0.176938	0.18147	0.122424	0.096933	0.269658	-0.09981	0.12099	0.140393	-0.065443	0.244388	0.005883	0.348696	0.229794	0.085169	0.104619	0.256132	0.042091	-1.33233	-0.264172
0.00170131	0.206018	-0.109537	-0.064131	0.072207	0.210166	-0.288704	0.051508	-0.809223	-0.273477	-0.124133	-0.100879	-0.052244	-0.152121	-0.128414	-0.258497	-0.158523	-0.164682	-0.05924	-0.139852	0.027812	-0.169727	0.001283	0.022362	-0.224775	-0.083035	-0.084007	-0.066425	-0.6721	-1.05366	-1.07731
0.00302455	-0.079815	-0.109178	-0.367056	-0.059791	-0.423313	-0.146965	-0.262679	-0.306724	0.027054	-0.031586	0.042707	-0.053511	-0.102648	-0.06557	-0.114627	-0.1378	-0.065698	-0.214457	-0.046525	-0.107882	-0.075156	-0.080875	-0.043729	-0.042575	0.009026	-0.150362	-0.146009	0.053128	-0.581576	-0.249044
0.00472585	-0.083894	-0.114329	-0.178871	-0.106211	-0.471161	0.045468	-0.110848	-0.128782	-0.029132	-0.180081	-0.198827	-0.144695	-0.141947	-0.114941	-0.061725	-0.210569	-0.075297	-0.189998	-0.12701	-0.118231	-0.13088	-0.060917	-0.263632	-0.070028	0.0284	-0.177928	-0.059049	-0.1601	-0.387006	-0.477526
0.00680523	-0.040038	0.036654	-0.172432	-0.055437	-0.187811	0.068169	0.129324	0.137906	-0.063811	-0.148518	-0.066777	-0.05875	-0.008863	-0.03207	-0.000944	0.006883	0.017227	-0.068757	-0.019871	0.131049	0.031326	0.09933	0.013214	0.050283	0.122104	-0.158496	-0.122482	-0.136078	0.382395	-0.492782
0.00926267	0.033096	-9.9e-05	-0.097879	0.018834	0.015706	-0.151551	0.123151	0.011865	-0.02651	-0.041769	0.043264	0.00782	-0.028877	0.041935	-0.076005	0.036769	-0.164191	0.037017	0.114958	-0.069157	0.014966	-0.014041	0.038892	0.005302	-0.070932	0.041966	0.093343	-0.121354	-0.409215	0.291968
0.0120982	-0.049879	0.011769	-0.144747	-0.039643	-0.109466	-0.094518	0.001337	0.00625	0.212901	-0.065562	0.045103	-0.125244	-0.054299	-0.025397	0.028806	-0.055714	-0.001066	0.106944	0.082084	-0.153727	0.030767	-0.087219	-0.094221	-0.019946	-0.135053	-0.11181	-0.063634	0.255532	-0.180448	0.44195
0.0153118	-0.109261	-0.035145	0.109462	-0.09993	-0.208082	0.071697	-0.298198	-0.041838	-0.062979	-0.109516	-0.186171	0.092114	-0.083961	-0.021303	0.040196	-0.090541	0.02844	0.05603	-0.078293	-0.013028	0.090468	0.106097	-0.181302	-0.109648	0.079603	-0.043475	-0.117136	-0.117518	0.011059	1.04591
0.0189034	-0.047716	-0.001481	0.123827	0.018413	-0.21937	0.10219	-0.0445	-0.051193	-0.069324	-0.140353	-0.07141	0.078854	-0.163588	-0.005462	0.030002	-0.078356	-0.062873	0.00406	-0.137793	-0.185942	-0.02455	0.099249	-0.060876	-0.014269	-0.113344	-0.052686	0.173462	-0.086623	-0.324961	-0.065978
0.0228731	-0.095703	0.050176	0.000837	-0.113231	0.07662	-0.131753	-0.326159	-0.291427	-0.113295	0.011174	0.104116	-0.023543	-0.117484	-0.036126	-0.076036	-0.1653	-0.089798	-0.065066	-0.154526	-0.064023	0.027204	-0.064642	-0.04949	-0.12544	-0.090891	-0.277692	0.114482	0.514207	-0.461096	-0.231755
0.0272209	0.273194	0.137873	0.087934	-0.105819	0.079534	0.040999	0.138923	-0.105729	0.020026	0.163098	-0.024045	0.090216	0.09611	0.037069	0.056399	0.159981	0.066393	0.066945	0.046444	0.05351	0.053521	0.076143	0.128921	0.062437	-0.001947	-0.127676	-0.100517	-0.241225	0.070326	0.044654
0.0319468	0.177515	0.226059	0.006136	-0.093238	0.023286	-0.011536	0.201871	-0.27157	-0.131447	-0.095745	-0.034905	0.049143	0.017716	-0.055232	-0.023887	0.064014	-0.044788	-0.013221	-0.009817	0.066036	0.052984	-0.055668	0.130558	0.080501	0.033243	-0.094644	-0.096018	0.004052	-0.111458	-0.525987
0.0370507	-0.000561	0.038998	0.096145	-0.06834	0.02152	0.107942	0.122794	0.344187	0.118632	0.020829	0.071628	0.134269	0.124773	-0.00696	0.124039	0.040812	0.092993	-0.037391	-0.04761	0.018416	0.099204	0.068808	-0.043142	-0.064032	-0.029015	0.003033	0.175495	-0.401471	-0.157807	0.429144
0.0425327	-0.127467	0.008599	0.020963	-0.065139	-0.100832	0.013822	0.130485	0.099147	-0.139361	-0.187453	-0.133118	-0.018608	-0.099021	-0.036004	0.054825	-0.06541	0.083069	0.017203	-0.108448	-0.106543	-0.051831	-0.07723	-0.130563	-0.135645	-0.006858	-0.024574	0.039558	0.112567	-0.044766	-0.800819
0.0483927	0.275429	-0.026979	0.005752	0.103547	0.007422	0.28345	-0.009345	0.199046	0.072851	0.033138	0.316263	0.027053	0.051045	0.030982	-0.107116	-0.031361	0.021712	0.029067	0.06244	-0.081088	-0.146577	-0.005134	-0.015675	-0.01977	-0.062515	0.021784	-0.165635	0.058286	0.307797	-0.39467
0.0546309	-0.011386	0.062721	0.0296	0.09497	-0.035377	-0.270107	-0.058713	-0.126707	-0.095559	-0.037776	0.073863	0.008908	-0.055892	0.004326	-0.080823	0.033706	-0.142036	-0.166154	0.057788	-0.093896	-0.078952	-0.17658	-0.163985	0.139482	0.049746	0.045961	-0.154763	0.448448	0.134835	0.217366
0.0612471	0.064333	0.03236	-0.040628	-0.04522	0.052032	0.352834	-0.105229	0.112374	0.113145	0.043655	0.09433	0.094621	-0.005877	0.103782	0.145587	-0.030859	-0.027169	-0.064653	-0.029467	-0.016257	-0.031113	-0.021477	0.027058	0.005061	0.083736	0.022547	0.270277	0.692188	0.211666	-0.233575
0.0682413	0.006808	-0.161137	0.01466	-0.074019	-0.054499	-0.194793	-0.020203	0.052567	-0.078673	-0.104935	-0.088868	-0.175947	-0.040414	-0.007718	0.028257	-0.076608	0.076777	-0.135869	-0.113873	-0.204513	-0.020792	0.058419	0.021392	-0.083992	-0.057362	-0.313497	-0.094186	-0.373351	-0.06448	-0.19855
0.0756137	0.010305	0.073886	-0.001899	0.051569	-0.003859	0.053501	-0.055852	0.002727	0.144698	0.029473	-0.1936	0.03809	0.156681	0.001667	0.033502	0.019792	-0.101872	-0.105136	0.024435	0.000943	-0.113165	0.098376	0.045395	-0.095507	-0.080198	0.200413	0.018047	-0.533162	-0.102864	0.126701
0.0833641	-0.059671	0.133114	-0.036718	0.253701	-0.032777	-0.070309	0.026125	0.039355	-0.041307	-0.16478	-0.003386	0.008589	0.082054	0.085504	0.10112	0.165539	-0.105287	-0.013929	0.184398	0.107194	-0.011785	-0.02057	0.134403	0.110493	0.008167	0.048188	-0.044711	-0.157397	-0.09392	0.332749
0.0914925	-0.041072	0.220982	-0.042985	0.232985	0.018337	0.152758	-0.229391	0.147839	-0.023922	0.12254	0.165806	0.082464	0.039243	0.176395	-0.08461	0.122738	-0.035181	-0.007232	-0.07756	-0.091288	0.093365	0.060067	0.057219	0.186281	0.245319	-0.091599	0.294181	-0.286269	0.550238	-0.134347
0.0999991	-0.091122	-0.156812	0.025475	-0.060736	-0.127685	-0.27497	0.028669	-0.092189	0.01308	-0.080676	-0.16133	-0.127374	-0.039044	-0.003821	-0.075621	-0.077572	0.027366	0.001953	-0.084182	-0.004493	-0.007954	0.009771	0.052108	-0.200111	0.186055	0.023194	-0.110676	-0.051249	-0.148837	-0.49583
0.108884	-0.067966	-0.138719	-0.084821	0.008877	-0.154333	0.056131	-0.051273	-0.299818	-0.062407	-0.137626	-0.1028	-0.048634	0.003156	-0.014825	-0.017211	0.048955	-0.002913	-0.023605	0.034868	0.054587	-0.125123	-0.184781	-0.059607	-0.056981	0.063734	0.079899	-0.003006	0.397857	-0.188745	-0.156448
0.118146	-0.175525	0.044899	-0.219614	-0.103458	-0.169264	-0.100625	-0.218298	-0.072672	-0.14623	-0.084555	-0.041978	-0.066713	0.045641	-0.080972	0.008957	0.105599	-0.060732	-0.117291	-0.007127	-0.097459	-0.022756	-0.193591	-0.082548	0.019752	-0.07944	0.052744	-0.157264	0.240084	-0.564066	0.097515
0.127787	-0.1805	-0.054885	-0.032599	-0.204122	-0.172133	-0.109627	-0.18195	0.041838	-0.137402	-0.017341	-0.023605	0.082058	0.009861	0.028386	0.104694	0.012182	-0.078668	-0.008545	-0.010029	-0.061062	0.07678	-0.013126	0.139426	0.007517	0.006378	0.026436	-0.296748	-0.03155	-0.134537	0.47254
0.137806	-0.187364	-0.122624	-0.277251	-0.219748	-0.183569	-0.215196	-0.212062	-0.169783	-0.132796	-0.184992	0.065862	-0.036898	0.033142	0.077901	0.053747	0.038229	-0.07518	-0.083916	-0.032143	-0.19965	0.075064	-0.068715	-0.031858	-0.06377	-0.197052	-0.027126	-0.005515	0.083948	0.728682	-0.572392
0.148203	0.083135	-0.07976	0.003926	-0.228667	-0.150785	-0.158658	0.188044	-0.264009	-0.021908	-0.077427	-0.093295	0.142337	0.000733	0.159104	0.056757	0.179536	-0.053556	0.00139	-0.035165	-0.078355	-0.063511	-0.075042	-0.164597	-0.150954	-0.058626	0.075251	0.209815	0.433188	0.668448	0.266348
0.158978	-0.218288	-0.154639	-0.240246	-0.293865	-0.270927	-0.315832	-0.256083	-0.287288	-0.255803	-0.057999	-0.23231	-0.089974	-0.015476	-0.023717	0.045773	0.089719	0.047967	0.110725	-0.062956	0.086748	-0.297845	-0.14231	-0.060566	-0.149729	-0.092547	-0.027415	0.214853	0.115758	-0.249143	0.045481
0.170131	-0.013771	-0.203882	-0.25827	-0.250703	0.005044	-0.282712	-0.269727	-0.08977	-0.256316	0.077044	-0.047528	0.007596	0.081597	-0.063048	0.146355	0.085345	-0.144305	-0.015938	0.050736	0.007703	-0.124966	-0.226768	0.035673	-0.137536	-0.176404	-0.10923	-0.148724	-0.149608	0.841528	0.358349
0.181662	-0.275695	-0.289472	-0.157039	-0.265122	-0.087109	-0.284272	-0.332325	-0.218572	-0.237798	-0.274136	-0.003946	-0.064589	0.234258	0.008569	0.108585	0.078433	-0.111428	-0.121131	-0.045173	-0.019417	0.059968	-0.181709	-0.063239	-0.092095	-0.042211	0.121711	-0.112252	-0.582039	-0.675959	-0.161
0.193571	-0.176173	-0.289769	-0.49774	-0.23514	-0.372983	-0.273518	-0.288381	-0.058702	-0.15562	-0.151374	0.071589	-0.048081	0.090998	0.062528	0.147859	0.318469	-0.058242	-0.059309	-0.008743	0.045438	0.330208	-0.172302	0.012175	0.135802	0.002729	0.092713	0.007534	-0.01769	-0.96774	0.253568
0.205858	-0.096619	0.023472	-0.404045	-0.316637	-0.343278	-0.333807	-0.383986	-0.159229	-0.307788	-0.386928	-0.14117	0.121631	0.055897	0.069828	0.085477	0.152281	0.127424	0.158768	0.167845	-0.152409	-0.057406	-0.065619	-0.085905	0.072238	0.006165	0.012931	-0.096159	-0.030524	-0.197855	-0.858329
0.218523	-0.372838	-0.225354	-0.337743	-0.298903	-0.477213	-0.352903	-0.383157	-0.139309	0.161223	-0.416207	-0.097034	0.138962	0.139699	0.283608	0.187903	0.347019	0.151331	0.25823	-0.045035	0.067841	-0.257495	0.382127	-0.19646	0.118137	-0.016047	0.0055	0.19033	0.128924	0.287997	-0.587083
0.231567	-0.279742	-0.190084	-0.431175	-0.327037	-0.498893	-0.291917	-0.475067	-0.500075	-0.06461	-0.286381	-0.105603	-0.04004	0.107719	0.005001	0.275601	0.320749	0.122491	-0.064937	-0.065174	-0.033929	0.134457	0.092469	-0.083414	0.134108	-0.001925	0.176937	-0.094361	0.156491	-0.249234	-0.034403
0.244988	-0.082806	-0.1517	-0.495783	-0.391594	-0.544628	-0.312624	-0.51271	-0.63508	-0.415682	-0.321538	-0.476409	-0.050664	0.054057	0.093497	0.423884	0.129585	-0.034317	0.199111	0.099462	0.159193	-0.082311	-0.195495	0.128551	-0.137099	0.068771	-0.14565	-0.071407	-0.369999	-0.103394	-0.179834
0.258788	-0.42822	0.128215	-0.579199	-0.302418	-0.616318	-0.304611	-0.342661	-0.548509	-0.368575	-0.216972	-0.297398	-0.205653	0.07418	0.174966	0.189179	0.181607	-0.095362	0.102194	0.144485	0.196525	-0.051734	-0.245027	0.228648	0.048565	-0.001681	-0.013516	-0.090068	-0.424084	0.69822	0.143015
0.272965	-0.292297	-0.079138	-0.41103	-0.094025	-0.642034	-0.225135	-0.427707	-0.58277	-0.358034	-0.444432	-0.302089	0.011268	0.019012	0.070045	0.252763	0.511669	0.101511	-0.064734	-0.140693	0.093075	0.132226	-0.04076	-0.025983	0.022984	0.03251	0.030826	-0.210312	-0.7841	-0.659486	-0.380377
0.287521	-0.506312	0.075349	-0.516591	-0.478791	-0.498261	-0.615651	-0.281691	-0.551376	-0.594996	-0.126707	-0.294809	-0.047371	0.215005	0.092577	0.340157	0.402845	0.139456	0.177335	-0.005914	-0.057033	-0.049216	-0.142815	-0.043206	-0.024451	0.15231	-0.272012	-0.193373	-0.41653	-0.404651	-0.023356
0.302455	0.045555	-0.259354	-0.306618	-0.624799	-0.444231	-0.68502	-0.216066	-0.342899	-0.629503	-0.068447	-0.199836	-0.107622	0.289926	0.244837	0.382964	0.318864	0.176118	0.253233	0.503797	-0.012182	0.144629	-0.048491	-0.124493	-0.161467	0.058842	0.054795	-0.126989	0.509599	-0.092879	0.19052
0.317766	-0.019283	-0.035747	-0.373456	-0.784002	-0.377074	-0.797488	-0.54059	-0.451875	-0.62459	-0.292356	-0.325634	-0.189227	0.048532	0.218829	0.107013	0.268857	0.067933	0.285219	0.127725	0.248488	-0.052848	0.082055	-0.25534	0.004713	0.150552	0.329191	-0.128727	0.330563	-0.657925	1.771
0.333456	-0.177523	0.042481	0.034488	-0.787126	-0.358857	-0.783975	-0.616029	-0.564693	-0.674929	-0.475432	-0.189015	-0.256452	-0.063525	-0.001927	0.044461	0.379811	0.205191	0.088786	-0.161924	0.089831	-0.244097	0.435079	-0.018999	0.043389	-0.029772	0.140031	-0.110301	0.234095	-0.427537	0.425772
0.349524	-0.199867	-0.162855	-0.218607	-0.628457	-0.496346	-0.65471	-0.736022	-0.310588	-0.674138	-0.653601	-0.430566	-0.196578	0.04349	0.104887	0.296534	0.353235	0.131313	0.096191	0.068638	0.333518	-0.29008	0.030346	0.237525	-0.025908	-0.350029	0.030261	-0.109983	-0.280244	0.585919	-0.676429
0.36597	-0.625098	-0.324859	-0.393897	-0.558256	-0.967187	-0.680414	-0.873454	-0.412852	-0.408573	-0.833444	-0.489444	-0.088132	-0.091654	0.104184	0.143134	0.314034	-0.127998	0.195089	0.193333	0.082324	0.218236	-0.207111	-0.049579	-0.008099	0.009515	0.055687	0.070262	-0.133469	1.48433	-0.142046
0.382794	-0.203459	-0.087922	0.211686	-0.713354	-0.780647	-0.796176	-0.840132	-0.599901	-0.513105	-0.758382	-0.364083	-0.234719	-0.048219	-0.05744	0.349426	0.363829	0.183368	-0.043716	0.016348	-0.149803	0.287276	0.017116	-0.163053	0.026998	0.073109	-0.038533	0.051861	0.247106	0.794314	0.309962
0.399996	-0.128959	0.175227	-0.370876	-0.481625	-0.847349	-0.335414	-0.784461	-0.877127	-0.5713	-0.643924	-0.529287	-0.325285	-0.128694	0.085887	0.229853	0.298031	0.070247	0.134109	-0.015733	0.082021	-0.046405	0.021266	0.028718	0.024778	0.040987	-0.300784	0.529142	0.017975	-0.557266	0.228261
0.417576	-0.490371	0.146635	-0.174856	-0.159453	-0.791215	-0.543528	-0.807439	-0.885866	-0.672438	-0.642223	-0.680282	-0.328237	-0.115439	-0.079661	0.024406	0.282354	-0.026259	0.027652	0.101887	0.215126	0.114372	0.039848	-0.071609	-0.093032	-0.200248	-0.300073	0.203034	0.570951	-0.069988	-0.157518
0.435535	-0.234852	-0.400659	-0.30711	-0.434774	-0.695075	-0.670577	-0.558983	-0.793532	-0.688004	-0.392231	-0.588194	-0.385973	-0.115449	-0.002354	0.216554	0.56337	0.014014	-0.008152	0.003824	0.121128	0.230541	0.323034	0.000489	0.076288	-0.123244	-0.283961	-0.142141	0.094069	-0.941145	-0.574011
0.453871	-0.068539	0.136115	0.531615	-0.127787	-0.727938	-0.789753	-0.506724	-0.826419	-0.866355	-0.501875	-0.712088	-0.506855	-0.109114	-0.10791	0.21382	0.297994	-0.06581	0.090904	0.187744	0.334348	0.334697	0.385514	0.097355	-0.110687	0.14563	-0.054863	-0.208305	-0.420204	-0.36741	-0.317376
0.472585	-0.550544	-0.129168	-0.490185	-0.632208	-0.488099	-0.837663	-0.589894	-0.645525	-0.86697	-0.573191	-0.548203	-0.612067	-0.157806	-0.098641	0.145772	0.410597	-0.002572	0.209982	0.107029	0.145971	0.148754	0.183473	0.180988	0.12617	-0.057098	0.035823	-0.375394	-0.380166	1.52384	-0.688658
0.491678	-0.341677	-0.106959	-0.545723	-0.319922	-0.428771	-0.886961	-0.744404	-0.513171	-0.82588	-0.714264	-0.419155	-0.56251	-0.106047	-0.001404	0.02757	0.425398	0.002346	0.21854	0.139484	0.320614	-0.047892	0.317369	-0.22066	0.060484	-0.157375	-0.120504	-0.302085	-0.409971	0.230114	0.159098
0.511148	0.125225	-0.404623	-0.464962	-0.471125	-0.184362	-0.744888	-0.735202	-0.580897	-0.655292	-0.724304	-0.416631	-0.342132	-0.146412	0.058347	0.208655	0.520287	0.08403	0.158165	0.193567	0.142252	0.181249	0.408189	0.213158	0.277016	0.285921	-0.018093	-0.103472	0.140434	-0.163973	0.510513
0.530997	-0.221144	-0.16283	-0.347466	-0.335794	-0.535406	-0.67988	-0.796668	-0.757506	-0.763797	-0.816182	-0.47418	-0.422154	-0.281805	-0.008001	0.139562	0.179839	-0.001633	0.221024	0.072167	0.158326	0.362646	0.130935	0.005256	0.139176	0.238727	-0.002165	0.073811	0.056479	-0.547852	0.61714
0.551224	1.95009	-0.061716	-0.212513	0.315075	-0.470163	-0.521793	-0.772269	-0.748648	-0.434666	-0.752187	-0.691284	-0.204775	-0.363487	0.024196	0.047965	0.245803	0.024536	-0.016482	-0.073421	0.424606	0.268461	0.126896	0.58545	-0.036419	0.117595	0.073302	0.207106	-0.271416	0.0444	0.045414
0.571828	-0.4841	-0.272023	0.199023	-0.489121	-0.0121	-0.252075	-0.671421	-0.788947	-0.573257	-0.662647	-0.68363	-0.273241	-0.300977	-0.144147	0.121042	0.242416	-0.036135	-0.05637	0.094909	0.277518	0.247296	0.18593	0.629536	0.236296	0.106403	0.183263	0.035384	0.405306	-0.795809	-0.500084
0.592811	-0.556754	-0.343312	0.575177	0.20894	-0.388689	-0.511979	-0.731672	-0.76401	-0.677962	-0.512518	-0.704413	-0.385041	-0.212726	-0.310119	0.160462	0.208593	-0.06725	-0.02561	0.020387	-0.027723	0.129339	0.219254	0.171918	0.254066	-0.067774	-0.14866	0.03142	0.028015	-0.221518	0.098755
0.614172	0.249749	0.253352	-0.126268	-0.104002	-0.388138	-0.330119	-0.523364	-0.802298	-0.662293	-0.423489	-0.719305	-0.564985	-0.296856	-0.245669	-0.017024	0.04337	-0.108461	0.066765	-0.00554	0.012663	0.186079	0.14008	0.046797	0.01661	0.157575	-0.213887	-0.355641	0.386786	-0.079576	0.036843
0.635911	1.76966	0.014499	-0.165005	1.30685	0.034872	-0.156858	-0.194299	-0.588665	-0.611336	-0.454816	-0.371694	-0.49273	-0.09172	-0.171281	-0.017827	0.260772	0.009209	0.12059	0.196096	0.196503	0.173737	0.22532	0.027855	0.197667	0.004357	-0.140519	-0.056341	0.031653	0.377661	-0.073583
0.658028	-0.019478	-0.339856	-0.17573	-0.692449	-0.390916	-0.12923	-0.386017	-0.604056	-0.705534	-0.633222	-0.329551	-0.592577	-0.256607	-0.213944	-0.071423	0.179482	-0.112376	0.027133	0.13541	0.184702	0.000963	0.339092	0.072466	0.410103	0.07052	0.126394	0.173765	0.011701	-0.532931	-0.059779
0.680523	-0.653068	0.328292	-0.131856	-0.776703	0.007823	-0.135389	-0.315336	-0.227758	-0.642728	-0.593026	-0.385554	-0.460094	-0.416779	-0.08678	0.055642	0.177343	0.022096	0.063419	0.063023	0.263688	0.284144	0.015915	0.201528	0.294486	0.157326	0.173449	0.063031	-0.205984	-0.175759	0.661188
0.703396	-0.025399	0.058625	-0.656262	0.013681	-0.316085	-0.597476	-0.514378	-0.320105	-0.503556	-0.633035	-0.747096	-0.413878	-0.381156	0.03305	0.005195	0.146379	-0.137163	0.02183	0.1149	0.230316	0.034624	0.124179	0.281173	0.252738	0.112327	0.035325	-0.057381	-0.244787	0.323401	0.26292
0.726647	-0.191405	-0.351288	-0.146074	-0.131104	-0.436192	-0.251749	-0.650102	0.070108	-0.319062	-0.573438	-0.516804	-0.237827	-0.336591	-0.288279	0.05684	0.175048	-0.239657	0.074572	-0.051321	0.033183	-0.015291	0.189784	0.082291	0.176256	0.017444	-0.141469	-0.130449	-0.12912	-0.244909	0.034054
0.750277	-0.946395	0.818759	0.201162	-0.081692	-0.845305	0.891071	-0.058202	-0.272097	-0.185146	-0.559536	-0.460727	-0.320915	-0.272232	-0.395839	-0.05121	0.028009	-0.206626	0.093575	-0.179984	0.07801	-0.030276	0.270279	0.17538	0.342166	0.021234	-0.066096	-0.131723	-0.031738	-0.175796	-0.40821
0.774284	0.655061	0.112452	3.06603	-0.856015	0.237666	-1.23967	-0.338571	-0.361343	-0.330479	-0.451153	-0.473193	-0.276758	-0.188377	-0.333908	0.027924	0.144797	-0.133476	-0.055768	0.186523	0.1187	0.086679	0.341559	0.111021	0.370727	0.155456	-0.069422	-0.026142	0.322119	0.790267	-0.387558
0.798669	0.637861	-0.558365	0.798514	-0.729189	-1.24582	-0.380305	0.577237	-0.145998	-0.525204	-0.054708	-0.351792	-0.450431	-0.177897	-0.168162	-0.047105	-0.043493	-0.070632	-0.097004	-0.005419	0.057557	0.143808	0.072608	0.260778	0.112898	0.193297	0.180531	0.1423	-0.100458	-0.357395	-0.206186
0.823433	-0.120975	-0.283986	0.992357	1.15501	0.450632	-0.098551	-0.380376	-0.205099	0.054059	-0.200751	-0.321667	-0.438884	-0.299798	-0.106748	-0.170826	0.070209	-0.155809	-0.108531	-0.069893	-0.03882	0.173092	0.032076	0.011232	0.151256	0.247136	-0.067566	0.032104	0.197623	0.050691	-0.063938
0.848574	0.380536	-0.359734	1.05044	1.22085	1.26788	1.12736	0.476964	-0.65195	-0.251355	-0.212663	-0.242631	-0.238703	-0.326571	-0.221953	-0.242886	0.099868	-0.127426	-0.112166	-0.038947	-0.055611	-0.00794	0.077477	-0.025176	0.135505	0.229734	0.134579	-0.071	-0.095594	-0.434643	-0.030247
0.874094	-0.48018	0.255831	-1.24569	0.45333	-1.06155	-0.217839	0.333113	-0.470284	0.11995	-0.354315	0.086395	-0.25137	-0.354173	-0.126854	-0.042456	-0.061387	-0.199309	-0.162262	-0.034827	-0.081414	-0.064633	-0.029706	0.046448	0.162453	0.057968	0.240609	-0.216404	-0.31848	0.237752	-0.031969
0.899992	-0.784907	0.453265	-2.90875	-0.229954	1.99079	-0.864894	-0.357408	-0.186201	-0.206261	0.095304	-0.316602	-0.077465	-0.289238	-0.207735	-0.075149	-0.016309	-0.26422	-0.07379	-0.133739	0.009845	0.042365	0.017196	0.03697	0.134175	0.301476	0.072142	0.0677	0.015062	-0.621821	0.340181
0.926267	-0.277589	-0.515147	-1.22842	-0.527107	-0.1537	1.28089	-0.036972	0.821687	0.155839	-0.106397	0.064898	0.042089	-0.068826	-0.175834	-0.083379	-0.206196	-0.293284	0.110828	-0.133254	0.084978	0.027821	0.143277	0.008453	0.172657	0.223394	0.300398	-0.010383	-0.004379	-0.323672	0.383149
0.952921	-0.144813	-0.402366	1.51848	1.80748	-0.319454	-0.014969	-0.402212	-0.466025	-0.491579	-0.341152	-0.476456	-0.070074	-0.05513	-0.193453	-0.125344	-0.143937	-0.145584	-0.097899	-0.236364	-0.015771	-0.113419	0.042593	0.016745	0.246236	0.097674	0.074618	-0.230337	-0.204071	0.231174	-0.367412
0.979953	-0.527708	0.199642	0.319269	-1.33898	-0.253184	0.986632	-0.391292	0.278597	-0.154936	-0.152323	0.043708	0.053449	0.018863	-0.085903	-0.154853	0.020628	-0.151402	-0.171612	-0.037933	-0.07733	0.06469	0.120574	0.09748	0.103146	0.061852	0.121077	0.055878	-0.337084	-0.515999	-0.058879
1.00736	0.426779	-0.230319	-0.833039	0.222961	0.100258	-1.22585	0.111798	1.20635	-0.144004	-0.174315	-0.185055	-0.09524	0.192619	0.083177	0.009343	0.072179	-0.02751	-0.206227	0.140817	-0.058058	8.1e-05	0.030108	0.063272	0.10328	0.124784	0.088039	0.301712	-0.268132	-0.326165	0.484279
1.03515	0.376964	-0.00928	0.034033	-0.015521	-4.55763	-0.956221	0.727299	-0.510247	0.118779	0.291569	-0.560193	-0.127934	-0.177495	-0.174964	0.057828	0.000345	0.027265	-0.122565	-0.003553	-0.015708	-0.09095	-0.049286	0.092623	0.127234	0.315665	0.155271	0.376135	-0.026954	0.269127	-0.075287
1.06332	0.708236	-0.260469	22.7387	-1.6662	1.02419	1.28333	-0.706843	-0.502854	-0.930423	-0.760526	-0.137556	-0.031249	-0.015766	-0.155735	-0.008472	-0.005935	-0.206559	-0.115984	-0.150806	0.048328	-0.079623	-0.034974	0.050672	0.175739	0.206657	0.227655	0.370793	0.33664	0.931815	-0.208597
1.09186	0.794082	-0.201808	-0.673738	0.151982	0.886486	-3.19197	0.406223	-0.649257	1.43317	0.537848	-0.001643	-0.07685	0.139776	0.028168	0.029075	-0.032095	-0.129134	0.076138	-0.179722	0.068779	-0.06935	0.086464	0.041359	0.174316	0.159067	0.114734	0.142332	0.542288	0.237298	-0.064949
1.12078	-0.44163	0.115294	-0.639926	-0.303838	-0.625239	6.97623	-0.053843	-0.336451	-0.023921	0.179775	-0.083667	-0.275668	-0.027527	0.064809	-0.147825	-0.134415	-0.132047	0.036353	-0.047607	-0.015519	-0.059968	0.055597	-0.011591	0.212539	0.323139	0.313431	0.149072	0.397803	-0.351085	-0.28756
1.15008	0.573124	-0.105764	20.9204	0.903873	-0.384983	-0.433707	-0.871717	3.14774	-0.51339	0.094932	0.1645	-0.162641	-0.042631	0.107407	-0.00416	-0.038716	-0.070388	-0.074685	-0.099635	-0.016717	-0.002233	-0.06171	-0.02711	0.141737	0.29457	0.269708	0.301411	0.471841	0.235011	0.609552
1.17976	-1.06554	-0.107221	-0.76661	-0.065611	2.97832	0.181312	-0.911567	0.651448	-0.192833	-0.528844	0.121789	0.107846	-0.097266	-0.090136	-0.023693	0.011252	-0.123311	-0.13891	-0.002108	-0.138363	0.002678	-0.003692	0.109086	0.08353	0.069917	0.265035	0.073329	-0.067409	0.240978	-0.026656
1.20982	0.588615	0.227239	0.921592	-2.62733	-1.32817	-1.94886	-12.8439	-0.926425	1.05673	3.5957	-0.158531	-0.547292	-0.027184	-0.240253	-0.181397	0.078118	-0.152872	0.012076	0.059374	-0.09085	0.027865	-0.062106	0.017403	0.077898	-0.14118	0.165625	0.016427	-0.577754	0.228315	-0.335391
1.24025	-0.448023	-0.266882	-0.458528	1.54191	6.49953	1.23304	-0.561106	-0.671547	1.23506	-0.163622	-0.309285	0.692493	-0.321549	0.141515	-0.105749	-0.025607	-0.232741	-0.094366	-0.03668	-0.02676	-0.012267	0.001621	-0.107169	-0.023529	-0.050099	0.046763	-0.05732	0.149829	-0.167745	-0.402305
1.27107	-0.244237	0.695339	-0.37023	2.28473	-1.99818	0.835989	0.470939	-0.860279	0.738485	-0.616567	0.46287	-0.070117	0.233275	-0.243837	0.092426	-0.119619	-0.183824	-0.107281	-0.063164	0.085848	-0.00644	0.002323	-0.055897	0.025661	0.196414	0.133035	-0.089977	0.577814	-0.046433	-0.003517
1.30226	-0.606527	-0.28502	1.14427	5.5067	-0.515063	-0.211557	-3.2822	0.823554	-0.799348	-0.643169	-0.793409	-0.835651	-0.59569	-0.31552	0.327677	-0.063947	-0.090472	0.007136	0.055588	-0.035226	-0.077848	0.048125	-0.044469	0.042277	0.152242	0.213312	0.237445	0.649471	0.133889	-0.202243
1.33382	-0.058072	-0.03349	-0.456462	-0.496979	9.09003	-0.747148	-0.550884	7.35158	-0.270306	0.328528	3.19633	0.251371	-0.042459	0.079366	0.112661	-0.302906	-0.233952	-0.185441	0.029388	0.041262	-0.017339	0.029861	0.053837	0.078358	0.081839	0.122263	0.386675	0.764409	0.567325	0.347836
1.36577	-0.5031	0.034434	0.317282	-1.74416	-0.404432	14.9973	0.848871	0.37937	0.958344	-0.661119	-0.9873	0.27561	-0.817555	0.489697	0.436437	0.399715	-0.132812	-0.185786	-0.173998	-0.01289	0.10695	-0.084674	0.030177	0.067881	-0.004872	0.057139	0.107788	-0.057559	-0.242545	-0.231281
1.3981	0.275744	-0.816857	3.88629	-6.92535	-1.4492	-1.44635	-1.58848	-2.57761	-0.902045	-0.016858	-0.448217	-0.10597	0.434616	-0.128045	-0.060628	0.117277	0.267465	0.190534	-0.155863	0.104951	-0.031982	0.046608	-0.023802	0.073787	0.05237	0.205902	0.055919	-0.26246	-0.384036	-0.095506
1.4308	-0.232723	-0.081356	-1.37093	-2.67782	7.53707	-1.14101	1.27046	-0.34072	-1.14169	-0.32674	-0.667531	0.939178	-0.095946	0.087524	-0.350548	-0.237536	0.116258	-0.145827	0.04363	-0.122824	-0.105155	0.04432	-0.115692	-0.04262	0.063889	0.052343	0.009897	-0.08965	-0.013822	-0.257611
1.46388	-0.419388	0.353151	6.3617	0.718489	-2.45533	-0.699367	-40.4329	-1.84826	-1.9449	8.78512	-0.86879	-0.775374	-0.293763	-0.256163	-0.053483	0.541538	0.017275	-0.27814	0.040418	-0.202734	-0.025573	-0.044146	-0.050806	-0.037722	0.034761	-0.018928	0.213407	-0.216687	0.136608	0.208726
1.49734	1.30798	-0.375341	0.020437	-0.424074	0.963319	0.000609	0.334281	-2.94502	-4.51372	-0.401992	2.59033	-0.236569	1.18298	-0.283903	0.24479	-0.065488	-0.251552	0.116713	0.243924	-0.162647	0.025076	-0.081032	-0.091289	-0.032471	-0.044907	0.022255	0.180859	0.211899	0.13687	-0.006382
1.53118	9.12272	-1.13057	0.912229	36.8894	-11.2033	-3.27338	-178.808	-1.47106	1.50191	3.57045	-0.032342	-0.170432	-0.854441	-1.14936	-0.010774	0.102488	-0.166974	-0.117173	-0.068721	-0.143225	0.00573	-0.096193	0.015932	0.015199	-0.09278	0.074476	-0.144926	0.201795	0.380887	-0.054343
1.56539	-1.11109	2.77942	-0.869342	-1.84893	0.425637	4.19234	2.26956	-0.874121	0.614652	0.213286	38.5425	1.3631	1.61487	0.228433	0.006282	-0.078312	0.182087	0.274008	-0.313189	0.370335	-0.058504	0.017516	-0.005224	-0.098552	-0.06726	-0.111065	-0.13365	-0.052131	-0.136989	0.138761
1.59999	-0.039792	-0.827223	-1.10832	-1.15283	-4.00958	-26.1708	-1.3172	2.49602	1.15368	-1.04882	-0.754632	-0.719383	-1.10874	-0.175048	-0.790854	0.315275	0.357797	0.20719	-0.081244	0.140276	0.013897	-0.101345	-0.184625	-0.145911	0.047373	-0.040039	0.041129	-0.164815	0.247424	0.09545
1.63496	0.917249	1.05025	0.256348	-3.31553	-0.015887	0.954194	1.03257	-3.53282	-1.79256	-3.349	15.855	-0.327419	1.20657	-0.061253	0.557515	-0.070673	0.049001	-0.515436	-0.304931	-0.318019	0.186109	0.039908	-0.233472	-0.017576	-0.070842	-0.063758	-0.049754	-0.191283	0.035995	-0.051801
1.67031	-2.01263	-2.07022	-2.95958	-3.30504	0.434626	-1.42859	-0.594363	0.733795	0.285462	0.975362	-0.139611	2.19424	-0.906044	-0.2121	-1.19491	-0.276642	0.056719	-0.315093	-0.316625	-0.194079	-0.02741	0.023134	-0.084064	0.054718	-0.130639	-0.047202	-0.136004	-0.320423	-0.05401	0.022958
1.70603	-0.799051	-23.468	1.66359	-0.824214	-0.440352	1.08092	-25.489	-20.0299	2.4803	0.102993	0.154761	-0.50805	0.378179	0.084155	-0.17289	-0.411135	0.123958	0.10624	-0.012853	-0.11063	-0.129643	-0.225742	-0.070383	-0.070368	-0.1728	-0.049307	-0.121077	-0.05609	-0.055987	-0.157583
1.74214	-1.83506	155.696	-2.07876	-4.81963	0.442598	-3.95888	3.46975	-0.308212	-0.842633	0.186515	-0.747598	1.07731	-0.312588	-0.834447	-0.193587	0.261137	-0.19102	0.005487	-0.010227	0.142048	-0.471774	-0.407932	-0.098483	-0.169931	-0.218348	-0.15318	-0.238603	-0.083934	-0.28744	-0.030204
1.77862	0.097678	-1.06872	0.919918	-1.59094	0.710825	0.248739	4.39402	5.32601	1.71762	-7.0279	0.08375	-0.016356	-0.556662	-0.605292	-0.530221	0.927119	-0.815067	-0.141815	-0.035109	-0.764574	-0.366938	-0.044008	0.101183	-0.088111	-0.005888	-0.260944	-0.305587	-0.297311	-0.296096	0.092683
1.81548	2.34674	3.1682	-2.86347	-2.1794	-0.598746	0.268855	-0.482934	-0.781515	-0.331871	2.37414	-1.33814	-0.158046	-0.079627	-0.203091	0.809778	-0.211889	-0.657651	0.163129	-0.369265	0.200915	-0.006866	0.184392	-0.114154	0.00321	-0.058261	-0.239865	-0.180437	-0.222631	-0.149783	-0.049871
1.85272	-2.72317	-1.89371	-1.10774	-12.2801	1.0885	-2.37198	0.299947	13.3592	3.6151	2.6136	-0.480158	-0.383525	-1.0659	0.666082	0.260654	-0.796508	-0.694563	0.130325	-0.038722	-0.416487	0.30875	0.075825	-0.231719	-0.136465	-0.233233	-0.141299	-0.143814	-0.19783	-0.165598	-0.330678
1.89034	7.04712	-40.6741	7.86236	-1.62332	-0.092761	-0.280356	0.266751	-0.788454	-0.371381	-2.13765	-0.818553	-4.26451	29.8456	0.165874	-1.29458	-0.975177	-0.746435	-0.412283	0.177235	-0.269523	0.125746	-0.280642	0.00043	-0.319705	-0.161244	-0.084391	-0.133755	-0.25137	-0.178549	-0.221277
1.92834	-0.565299	-9.15837	-4.18142	-1.94165	-0.28697	-4.69709	3.78991	-1.46582	0.710338	-1.57087	-0.002579	-1.02089	-0.182134	0.448337	0.532945	0.937698	0.095199	-0.387981	-0.163452	-0.386891	-0.485495	-0.448727	0.197961	-0.212371	-0.267069	-0.093482	-0.35244	-0.209133	-0.248491	-0.217127
1.96671	1.86536	3.10406	0.801847	-1.53247	-1.11077	-2.12007	11.153	0.279656	-1.51736	0.160095	-0.101458	-8.07146	-5.20885	0.183455	1.43791	-0.957602	1.0857	0.401927	0.795879	0.911952	0.680412	-0.170547	-0.25409	-0.08304	-0.155634	-0.18968	-0.259172	-0.015298	-0.17091	-0.05276
2.00546	-16.0925	-0.64073	0.795759	4.95523	1.61895	-4.76906	-1.19695	4.35026	-2.21254	-0.500316	-2.2493	-1.07473	-0.297039	-1.55779	-0.29371	-0.250327	-0.209824	0.372756	-0.891883	-0.266742	1.9217	0.017744	-0.377681	-0.031064	-0.183852	-0.281866	-0.146082	-0.220019	-0.222699	-0.183003
2.04459	5.08859	-3.99591	2.05475	-7.25972	-4.2673	-0.43509	3.31366	-1.48901	-3.3186	-17.0649	2.06118	14.4689	1.4574	0.114071	-0.855114	-0.880376	-0.407254	0.197161	-0.851336	0.595482	-0.702699	-0.296158	-0.721094	-0.043526	-0.062005	-0.156476	-0.156726	-0.336701	-0.284269	-0.217797
2.0841	0.753334	-0.736626	-0.862724	-1.24676	0.222506	-4.44867	-2.94609	2.81998	3.35163	0.369651	0.235042	21.0791	-0.885514	0.154564	-0.337433	0.699223	-0.541715	-0.559409	-0.091923	-0.243778	-0.23355	-0.641499	-0.30394	0.122602	-0.458967	-0.161646	-0.200428	-0.298289	-0.232179	-0.1195
2.12399	-3.08074	-0.915161	-3.07212	3.77421	1.15552	-0.417149	17.8401	0.643904	2.58944	-0.480389	1.50644	0.361983	0.63526	-0.58978	6.63697	-1.27665	0.520595	-2.14286	-0.143099	0.110705	-0.965926	0.310499	-0.443348	-0.139531	-0.224699	0.020083	-0.155541	-0.17583	-0.119219	-0.068557
2.16425	-2.69086	0.044756	-1.57959	-2.67899	0.057261	4.95137	-2.1094	-0.27364	-1.46657	-0.992797	-1.67856	-0.772971	-0.173352	3.64516	-0.655441	0.280902	2.97447	0.203371	5.5712	0.239511	-0.700463	1.17563	-0.360585	-0.394418	0.119759	-0.230516	-0.158548	-0.295249	-0.21755	-0.164778
2.20489	-6.25089	-1.75138	0.893061	0.948825	-0.580281	2.677	3.16121	-13.2371	0.393849	-0.552213	0.135801	-1.46607	0.698432	0.204267	-1.74385	0.361164	-0.484606	-0.477143	0.743823	-0.754799	1.01542	0.840875	-0.494548	-0.469368	0.10149	-0.25304	-0.186556	-0.277905	-0.325249	-0.161097
2.24591	0.590703	-2.42256	9.47139	-0.7569	1.66613	2.34332	-0.599594	7.64593	1.31037	9.70836	-3.47268	-2.24251	-1.78934	0.38614	-0.433668	0.134654	-0.778833	-0.57453	-0.828038	-0.573994	1.13042	-0.750261	-0.125695	-0.178034	-0.182647	-0.516344	-0.143011	-0.23198	-0.230221	-0.216311
2.28731	-5.2088	-3.94626	-13.3103	-0.623825	-0.896397	-5.24269	0.303364	-1.83425	0.970096	-95.5737	1.46578	-0.672094	6.36301	-5.28503	0.940541	-0.290039	0.969691	-0.640272	-0.151937	0.104146	0.071528	1.19764	-0.086985	0.152335	-0.212376	-0.162652	-0.356487	-0.005316	-0.00669	-0.113602
2.32909	-1.17985	-2.35958	0.749489	-2.86825	1.40937	-3.27093	-3.07004	-0.711959	-9.18758	0.449794	-0.107982	-0.813642	-13.1005	0.271186	-1.71034	1.04634	-0.213897	-0.575007	-0.236054	0.432653	-1.13395	-0.530529	0.869885	-0.378229	-0.430094	-0.01884	-0.335359	0.394269	-0.141826	-0.204819
2.37124	8.8692	3.36426	-1.502	3.78778	3.83353	4.15591	3.54822	12.98	-9.23026	-1.16035	4.97567	-5.81256	-4.09702	-29.7465	2.18094	-0.66527	-1.71169	0.720454	-0.591244	1.52479	-0.177876	-0.468733	-0.099348	-0.363812	-0.554269	0.400943	-0.278013	-0.102286	-0.241182	-0.141765
2.41378	-7.73728	1.92022	150.154	-2.94358	-0.047712	0.68744	-17.0651	2.9056	-0.194655	-1.70333	-1.51924	-5.86524	0.7281	-0.750332	-0.62339	0.592351	-0.558559	0.442063	5.19794	0.591287	2.37294	0.812769	1.50639	0.280729	0.127811	-0.023534	-0.641629	0.592538	-0.126531	-0.139398
2.45669	1.00254	-1.07741	-0.876744	-1.04049	-1.07131	-3.66163	-1.37164	1.32725	-0.227859	-0.203654	-3.31152	2.65836	-0.468114	-0.897637	1.16835	-0.05102	-1.09583	-4.14067	2.40185	-1.29881	-1.23665	0.403439	0.354457	0.656345	0.757487	-0.182904	-0.811565	-0.011336	0.46688	0.026209
2.49998	-1.737	-4.36632	2.65507	3.4429	0.140606	13.1362	-0.815481	0.703808	-1.48427	-0.651626	-1.95335	-0.161965	0.035899	1.02398	0.976803	0.94873	-0.811776	-0.810677	-0.204178	-1.41481	0.950787	-0.955848	-1.12155	0.055108	0.45415	-0.686901	-0.227752	0.596678	0.616611	-0.241174
2.54364	-1.44495	-0.822052	-1.66861	-3.57414	-0.951472	0.95558	-1.10078	7.45272	1.20043	0.045806	-1.30032	0.347124	-7.65613	-1.78557	-1.48072	2.17708	16.6386	0.625303	-0.613835	2.16237	0.762555	-0.706639	0.699641	0.249794	-0.324985	0.533775	0.256129	-1.3208	0.037157	-0.201917
2.58769	-6.18516	2.21196	-2.23011	-0.07089	-6.72677	-0.259003	-0.904027	-3.12066	-0.623542	2.84603	-2.25449	2.79133	0.889377	-1.0658	-2.17662	-1.49878	1.74753	2.03953	-1.60172	2.06583	1.35763	0.262008	0.522604	-1.05525	-0.937747	-0.615176	0.195249	-0.573327	-0.302563	0.37753
2.63211	-1.04704	-0.747164	-0.911889	2.92329	-0.281041	2.40449	3.98606	-1.13311	-0.147643	0.79661	-3.0283	-1.00502	-0.804607	0.903733	15.3205	0.508172	0.51358	-0.260138	0.666041	2.23238	-0.517191	3.20671	0.293837	-0.606692	0.043554	0.850043	-1.12855	0.986491	-0.494076	0.000975
2.67691	-6.59385	2.11141	19.4179	-24.7978	-0.912329	-1.65246	-1.78031	-2.10839	3.77465	-0.962493	-1.84697	4.39993	6.92127	-1.87152	-1.20615	4.96581	-2.92825	-1.19953	1.10893	-1.56304	0.243	-0.119997	-1.62317	0.988387	-0.303624	0.368506	-0.633655	0.710498	-0.054056	-0.7762
2.72209	-0.183976	-2.83271	-0.571183	-0.729014	3.60772	0.454886	1.16572	-0.632183	-2.10476	-2.55665	-27.5397	-2.1402	-1.57055	-0.92074	-15.7082	0.590467	1.15969	-1.19771	-1.27697	-1.47565	-1.00847	-0.646371	0.76881	0.196624	-0.039508	0.008108	-0.323033	0.625779	-1.22182	-0.511891
2.76765	-1.98623	-0.635126	-0.564503	5.54225	-0.76342	-0.83019	-0.083443	3.34457	-13.2159	-8.13043	-0.537596	273.592	1.32071	-0.00024	-1.16261	-0.799157	-17.349	-1.07044	-0.179655	0.685612	2.0631	-1.10856	0.626666	0.218356	-0.112126	-0.474075	0.093514	-1.65174	2.13088	0.60686
2.81358	0.248822	-5.16357	2.96157	-2.72977	0.13986	-1.72169	3.16974	-4.13603	0.715309	-5.67441	1.22896	-0.364875	-0.537774	-74.0337	-0.816093	-4.28139	0.529412	1.55167	0.844049	-0.695429	-0.427371	0.36795	0.806966	0.123872	-1.14554	-0.783944	4.3225	-1.73614	-0.669193	-3.84884
2.8599	-0.848477	-2.05891	1.02893	0.791646	0.43105	-2.33157	-3.69021	11.8135	-1.51038	-1.08312	-2.08583	-2.96722	0.412663	1.85135	-7.76203	-3.57768	0.127167	-0.784859	1.09498	0.28431	0.007394	0.538752	-1.96587	-0.150976	-0.102353	-0.06384	-1.49044	-1.07106	0.648853	-1.70748
2.90659	-38.1317	14.3724	-3.57536	-0.998025	0.826049	7.3866	0.004883	1.52609	-1.4626	-6.14318	-4.12661	-0.993297	-2.66607	2.2347	-1.38522	1.48849	-2.35899	3.04494	0.06648	0.918724	-0.717434	1.31415	29.7959	-0.498239	1.44615	-0.717999	-2.38526	-0.200478	-1.40818	-2.41138
2.95366	-2.417	-1.41272	-2.73108	-1.89437	-1.28366	-7.24355	-256.619	1.69105	-0.259034	-2.21345	-1.86923	-8.9651	1.21291	-1.41242	2.36523	0.340533	-5.97925	6.01173	-0.973877	-0.198573	1.30423	0.558398	-0.46986	0.347092	0.072532	7.95381	-2.63281	-8.56949	0.336765	-0.372833
3.00111	-3.23316	-2.63613	-5.32536	-0.56184	1.15314	-319.56	-1.24256	-0.498623	-0.494688	0.940278	0.341583	0.636257	-1.85693	5.81083	-0.53984	-3.02506	-1.39631	-0.863253	-1.89915	0.223704	-0.525547	-0.317307	1.00685	0.1947	-1.00184	-1.26543	2.12849	-403.225	-0.372369	2.07893
3.04893	-1.72974	2.49729	3.70444	-0.064806	-0.914808	-2.47175	-2.23628	-1.10146	0.447286	-2.46574	-0.594688	-2.37236	38.1106	6.33018	-0.065607	-1.60187	-1.10617	-0.237886	11.8937	-0.901741	-2.05097	-0.373675	-0.752871	-1.49155	1.09381	-1.06671	0.538006	-3.50765	-6.57873	-0.43369
3.09714	-1.87336	2.79787	-1.75128	-21.0316	0.200466	-77.9603	-0.570753	0.260822	7.85304	-3.64249	-0.169643	0.124293	-7.64171	4.31609	-1.41958	-1.56283	2.20904	2.92864	54.0681	-0.974567	-2.44558	21.2053	-0.288906	-1.30401	0.828245	-0.912647	-2.42953	-1.5583	1.05505	6.34302
3.14572	-4.12547	-4.39452	-2.48957	29.9798	-0.45465	4.09247	-42.9074	2.32002	2.96937	-0.593889	0.079789	-0.601887	-52.4206	-1.80112	0.750707	143.492	0.929526	-0.263315	-1.18436	-0.32636	-0.712555	-2.05554	84.12	1.52975	-0.565362	-5.52973	-2.12816	0.220376	-3.96757	-2.46096
3.19468	-6.01215	-0.202306	-0.529245	-2.98951	0.138283	-2.4667	1.09691	0.100982	5.49632	1.68904	-1.81403	2.98568	-1.20773	1.69575	0.452312	7.25305	-1.82356	1.04155	-1.64257	3.01694	4.51467	-1.20764	-0.66884	1.78568	-11.9386	4.64023	-7.51702	1.5621	-3.31229	-2.61375
3.24402	3.77615	-0.320435	-21.8925	-4.04179	-1.93237	0.479447	-1.89328	1.23781	-1.0867	1.0207	-1.48203	-0.009831	-0.658469	-0.962305	0.686572	-2.70132	0.74861	1.0839	-2.53337	0.660993	-0.975512	0.907049	-0.615051	-0.12816	7.40449	0.654094	-2.03646	-1.13896	-5.67809	2.68336
3.29373	0.672117	6.22004	-1.46526	0.530126	1.83488	2.11952	1.90011	-5.56312	0.249222	0.525956	-3.95207	0.174568	0.957825	-0.152505	0.581558	12.0741	2.50358	0.851191	-0.416637	-4.1629	-5.95391	1.87716	-0.972709	-1.37191	2.15742	-3.44927	-2.53687	-3.53013	-12.8635	-2.81047
3.34383	-0.140344	2.08987	-4.34216	12.5628	-3.73698	-33.9369	2.52266	3.22049	-2.12379	-1.90541	-2.33172	7.55206	-0.305277	-2.89545	4.25505	-11.7792	-0.625761	-6.85215	-1.50453	-1.01879	-0.248844	1.44027	1.52675	3.51899	-1.15213	-0.568825	-1.2919	2.13303	-30.2615	1.98817
3.3943	-9.04818	8.23763	-10.8998	0.692104	0.375572	1.63088	0.943499	-0.875648	-3.54638	-0.458967	9.28179	-2.34824	3.04773	0.379431	0.301872	-6.05025	4.13311	-9.36772	-0.717038	0.777197	-2.57379	-0.349019	2.88741	1.01587	-1.01905	-0.532006	-0.274745	-1.04125	-0.702062	6.57087
3.44515	-2.56295	-2.94896	9.70429	10.4717	-1.56586	7.91511	0.360233	1.27074	-16.2109	-2.62748	2.65374	0.215633	-2.13418	0.35726	-13.4033	-1.03169	12.3407	2.54854	-0.623914	-172.417	10.8614	-0.946275	0.019071	-0.980737	0.520392	-1.72185	-2.00647	-3.86542	-2.64812	0.991156
3.49638	9.23808	-4.10942	39.3717	-0.268088	1.3706	1.8578	-6.99781	20.5999	0.865451	1.15764	-178.195	-0.79917	-1.27961	0.819057	6.84026	2.40928	-1.38359	0.50871	0.981331	-0.395874	-1.16506	8.61291	-0.555345	0.147048	-2.20007	1.51088	-3.11509	-1.25826	-0.674689	-5.4137
3.54798	1.83435	-1.22626	3.57044	1.98573	-2.91927	1.34296	7.68784	-0.505379	-9.17943	0.485862	3.87929	0.401831	1.47967	-1.40405	-0.009815	-0.828842	-17.5416	-1.69063	4.15305	3.27923	0.493227	-2.48132	-0.693484	0.368508	-1.85553	271.746	-1.22825	-2.45517	3.33715	-3.95999
3.59997	1.02814	2.00007	1.98544	0.86397	0.522009	-0.91351	-50.4092	0.149831	-0.485588	12.111	-1.15358	-0.50345	-0.182337	-1.08444	-1.99834	-4.35275	0.698165	-4.73251	-2.1636	-1.06079	3.27027	4.10075	3.10574	-1.25543	0.480527	-2.33329	-5.7213	1.05529	-3.31183	-1.95382
3.65233	-6.0309	1435.39	-3.57112	-11.7622	-0.888213	11.6946	-0.306126	34.654	-1.55285	-2.00095	3.45947	-5.3213	2.77683	-0.477107	-5.72134	-5.41031	-1.04605	3.27155	0.865833	0.474934	-1.75512	-0.242145	-5.96767	6.60081	0.023349	-2.40466	0.583265	-3.06997	-0.236473	4.52834
3.70507	8.07941	-1.86164	3.29027	-2.07091	0.646025	-1.31633	0.417496	-1.74788	-3.10572	-0.111458	2.71454	-2.32601	-8.95356	0.287358	-0.915	-0.538313	-2.0358	-0.497613	0.272577	-1.37197	244.572	-0.728502	1.0529	-1.94084	-7.40625	-1.12249	2.06881	-4.65139	-3.54114	-2.59782
3.75819	-2.89185	0.321011	0.108273	-1.29717	-2.04243	0.782859	-0.644587	-1.08815	-0.821568	-2.73874	2.91492	0.285083	87.6055	-6.87821	-3.23907	-1.66122	0.347353	0.317885	-14.9354	-0.852046	-0.97774	-9.63967	-7.68256	-0.410006	3.23843	-1.0355	-7.01401	-3.53897	-0.206225	-17.7717
3.81168	-2.31617	-0.292506	-1.41392	0.919168	0.304587	-2.22401	-2.03752	-4.42895	-1.21757	-0.320352	2.02327	127.916	-1.22542	-8.01868	1.07928	-1.88099	-0.024692	-1.35754	-2.57624	-0.498952	31.0389	-0.739629	-2.09608	-26.9011	-0.374525	7.62556	-3.16567	-3.48784	-2.39951	-1.94189
3.86556	-0.256824	-0.625239	-1.62078	1.87352	-1.39478	0.619189	-2.35125	-2.14519	-8.39903	-2.78694	1.81257	3.06126	0.9674	-0.414255	-589.484	-1.42132	2.01771	-3.40102	-1.04839	-6.76275	-1.18253	3.752	-1.59319	-0.952446	-0.309448	-10.9853	-1.99994	2.073	5.15312	-5.61521
3.91981	-0.877851	-13.4705	2.85569	4.13511	0.632355	4.12755	-1.60992	-2.22668	-36.38	-0.870836	4.16576	18.8991	-0.398341	-1.62872	-0.186102	20.377	13.407	-5.01774	-0.320757	-84.3658	-0.201143	-2.21874	-1.23852	-0.919074	-0.344109	-0.940834	1.24322	-0.748897	-6.47187	5.67082
3.97444	1.66045	-2.98102	0.896427	-1.12126	-0.154376	-0.08875	0.855189	1.4517	-3.81888	5.95634	2.94205	-7.02058	2.03849	-0.505061	0.596656	29.9735	101.087	-0.667873	-0.656077	-1.04851	-3.82736	1.44976	-6.91448	-1.14841	-1.66196	-0.954026	-9.74909	-4.58289	6.57115	-1.96355
4.02945	58.8215	0.012578	-4.33106	-21.8929	0.252898	0.287856	0.687946	-1.95899	0.145399	-3.44791	-1.60546	0.482021	-0.979229	-1.58675	-1.58791	-0.377123	-2.90148	0.6068	-1.55826	-0.893947	-3.8792	1.68092	-2.14724	0.622408	16.2594	-21.0733	-2.58904	0.159798	23.1789	-13.8371
4.08484	0.229335	-2.61495	-1.29854	3.36343	-1.24942	0.565544	-2.26558	-0.02229	63.2385	-3.98177	5.93564	-1.12705	-23.6514	-7.8015	1.82592	-0.712989	-0.542214	12.589	-2.97479	6.64169	-0.583584	1.2827	1.41963	0.503672	-6.30433	-0.274644	-2.95255	-4.57504	3.22624	-0.771941
4.1406	0.778989	-2.88248	0.66475	11.2581	1.08204	-0.420488	-4.41121	-2.05632	-0.937105	1.17294	-7.21474	-21.9468	-0.53365	2.56097	-2.1402	-1.46532	0.802507	-0.279511	-9.80142	0.11075	-1.41964	-1.95199	2.06927	-0.504826	-0.737516	-2.51505	-2.527	-0.701345	-1.5683	3.25348
4.19675	-1.40046	2.47357	-0.377181	2.67366	0.101239	-1.54543	-4.02168	1.18057	13.0285	-253.631	-3.95734	15.8791	-1.6057	15.3305	-0.992042	1.57997	-2.30944	-0.872058	2.00309	-0.071661	0.700621	-1.8414	0.766409	0.47825	-1.14002	-0.440241	-1.02547	8.21069	7.49208	-3.53653
4.25327	-0.760267	-5.56233	-3.71892	-0.211382	-0.408815	-2.12537	-0.95091	-0.295292	-3.01935	-8.15226	0.68447	-1.4792	0.561801	-2.8806	1.13539	-2.25861	-0.709661	-0.479352	0.233776	-1.93293	-0.690554	-0.153381	0.864898	0.322336	-0.692052	-0.329681	-4.70808	25.9656	4.68636	-100.044
4.31017	1.52233	-0.636934	-0.806554	-1.32108	1.77131	-2.6435	-2.0115	3.50439	9.98094	-5.36442	-1.26218	-1.58958	-4.73909	3.16021	0.137378	-5.512	-0.047435	-0.448135	-0.708405	-1.62905	-2.47745	0.431841	0.704388	-10.1494	2.78234	-1.59055	-3.2813	-41.2655	-4.58002	-35.6516
4.36745	0.224879	-33.7574	4.65976	6.23278	-0.310682	-3.17593	-0.780958	-0.048344	-0.980616	-0.74998	2.65768	0.829961	0.640239	-3.47733	-1.53187	-2.4517	-1.18938	-0.528206	0.713908	-0.19411	2.387	-0.172392	0.594359	3.11298	10.3333	-1.32496	-1.01395	-4.63029	-4.25665	-1.51778
4.4251	70.7164	-1.95146	-1.53946	1.91208	-0.115074	9.79099	13.7642	13.7781	1.53181	1.31809	-8.41454	-0.440729	2.97099	-0.695798	1.92273	-4.63443	-2.0031	-0.516006	-11.7987	-1.90416	1.93199	-3.30794	1.37136	-0.444647	1.01373	1.87841	1.81419	-4.77825	38.4678	1.13799
4.48313	-2.77327	0.387192	-1.08604	-118.578	1.11141	-8.99948	-1.99499	1.65275	2.67426	-4.03352	-1.70821	-0.695361	-331.681	3.80061	0.583777	20.2537	-0.786972	-0.797359	-18.7941	1.88695	5.45427	-0.899388	-2.79631	-2.83835	0.174937	0.610034	-0.376223	-1.06311	-0.645799	-1.09863
4.54155	-3.26422	-1.11752	-4.29666	-649.699	-0.226092	5.3572	-1.01762	-2.4926	-1.38824	-2.47385	1.1393	-1.61322	-1.40019	-1.58749	-1.39593	-0.204046	2.14405	0.503047	-20.9392	-0.174448	-0.32159	-1.1552	-1.10506	-1.65652	35.0484	-3.72932	-1.00893	10.7196	0.442871	-2.46144
4.60034	-4.25783	-7.84615	0.932277	3.60639	-0.71454	1.75018	-4.34336	-1.33288	-0.053271	-1.85725	-0.794867	3.62824	-3.1761	-0.273706	0.956007	1.33361	-2.9513	-22.0308	-1.54594	3.33218	-2.56004	-0.381748	-26.5844	-1.26484	-0.904234	5.75788	-3.87092	-250.444	0.911017	-8.01429
4.6595	1.63335	7.06093	1.03734	-8.03355	0.874826	-11.7658	-1.60278	-1.74133	-2.27829	-2.54142	1.57854	7.76883	-4.93246	-2.7094	6.16268	-0.818049	-5.50166	2.31697	-1.14931	-0.517111	-1.46968	0.467603	-4.60419	0.518573	-2.6554	-2.98824	-105.671	0.336931	0.136596	-1.49882
4.71905	0.896914	-31.3837	-2.13974	-1.08605	-0.790872	-0.778987	-11.7993	1.39023	0.151001	0.318835	-6.26613	0.187657	-1.54284	-3.84394	1.19265	-1.22245	-5.27928	-26.628	-17.2878	-1.15976	-0.025829	-2.00321	-0.652555	0.968298	13.741	-1.04142	-7.6504	-2.12021	-0.377187	-1.96059
4.77897	-3.52032	-3.83701	-26.3896	6.805	0.133223	-1.30399	-2.1739	-2.92867	-178.909	-2.05894	-2.55314	-6.37164	14.3044	0.978673	-0.731337	-1.8664	15.0262	0.062936	0.589311	2.69852	4.68863	-75.7548	-0.478655	-2.08782	-0.242115	-2.43757	-1.04469	-0.054428	-0.819715	-3.27183
4.83927	-2.30941	3.16946	-0.160245	0.444527	0.530356	-0.952122	-0.064053	-13.1358	-0.155275	-1.01568	-1.02955	-1.46567	-13.4953	-0.286125	14.2487	-9.3927	-5.52423	3.59088	-3.24796	-0.221967	-2.82688	-2.33815	0.793939	-6.07924	-1.35632	-2.63203	-0.395529	6.81149	4.79031	-2.26745
4.89995	-38.6975	0.049952	-1.86742	-22.4054	-0.549481	-219.512	-1.02113	-2.67368	-2.41839	-7.04706	-2.51246	2.00162	-1.72791	27.8505	-1.39677	-0.615539	-3.36255	-3.67923	-2.19437	-0.790098	1.42348	2.50647	0.865298	-0.903556	-19.943	-18.4681	0.140945	1.03618	0.560527	-39.1834
4.96101	-0.219145	-2.54417	-11.5057	5.71882	0.13345	-1.32659	0.861026	-5.21495	-3.88355	4.20386	-2.37224	-0.288289	26.4916	0.233782	0.571479	0.950194	-1.49262	8.65995	-2.80176	-5.64758	-1.37373	9.02722	3.0193	1.06202	1487.33	-0.542503	9.43434	2.65602	0.94916	-35.9116
5.02245	-12.3191	0.515041	-1.19446	-1.14147	2.1432	-0.048781	10.5916	-1.94544	1.06249	-1.74625	0.412782	-0.954836	-2.68181	0.374331	22.35	-0.732289	0.686764	-0.817027	0.091348	-2.38744	-0.70409	-3.02174	-1.06428	1.88663	-0.62607	-0.513833	1.14462	-3.84971	3.93278	1.43628
5.08426	-2.65819	-6.03116	0.211288	0.414616	-0.771292	1.1294	2.07391	-2.72657	43.4332	-0.285174	3.82978	2.31629	-39.1483	31.0039	-1.94152	-1.60401	-0.719839	2.73895	5.03603	0.387666	3.51027	-1.76059	-0.023225	0.415459	-0.1716	1.57088	0.51063	9.79995	-5.66296	-2.48461
5.14645	-3.30614	-12.4081	0.409757	-1.27483	0.216063	-10.0734	2.94669	-10.1734	5.032	-2.62157	1.94103	-1.50419	-2.39154	-2.20512	-1.83327	-3.84721	3.46643	-1.50625	1.3559	1.98088	-0.673455	2.64717	-1.24104	0.254203	1.61463	0.363012	0.818002	-0.274828	11.0211	3.26615
5.20903	-14.2877	-1.8847	-13.9034	-3.97709	-0.246482	-1.02574	-1.16039	-6.32902	-1.32493	-3.08636	5.08142	-1.20754	-1.26977	-4.32827	-4.93691	-1.86316	3.80782	-3.34852	-0.478858	3.34275	-2.02954	-0.88823	-15.699	-0.310096	-254.972	7.97006	0.052432	1.37181	-158.504	-0.20517
5.27197	3.51186	-1.7241	7.51699	2.89701	-0.506111	-2.25397	-2.49224	-15.5219	1.34705	-2.18641	-1.21453	-0.771976	-2.80373	-9.76375	0.592757	7.71525	3.93346	-0.820005	6.57866	-0.75109	5.18641	-0.210562	-3.31464	-1.16238	-0.050035	2.55677	-0.558452	1.23619	0.717929	-2.82391
5.3353	2.3975	-5.44401	-0.619219	-8.53028	-0.3847	-0.763194	-6.4745	-3.1896	-2.55063	11.2787	0.781193	-2.10397	-5.13835	-34.0342	-6.18841	-1.0046	-0.713567	1.92568	-0.556152	0.379847	-1.02138	-1.38584	1.68843	-1.21149	0.453712	-5.23842	-0.813733	4.62729	7.75366	2.79094
5.399	-4.86509	-2.05355	-2.21845	1.35812	0.671095	0.602989	2.29946	-0.307441	-1.61157	-0.312895	-3.08907	-1.78932	2.65831	-2.12008	-0.143848	1.96937	-1.52433	9.26506	1.0302	-0.70975	-0.800454	-3.35673	-58.4007	-15.6615	-3.01859	-0.571059	1.31855	0.872647	-1.29176	-0.413017
5.46309	0.666014	2.67232	-1.19072	-1.72099	-1.09262	-1.92962	12.9796	4.65654	-2.36868	-2.81728	0.376502	-0.258001	1.2238	187.687	5.92589	-1.84942	1.34398	-34.0796	-4.30955	-3.71343	0.009518	-6.41917	0.183414	-2.18657	-0.534206	-0.356983	3.25077	-152.492	0.689516	2.62834
5.52755	-0.041431	2.86328	-0.26221	-2.16767	1.17904	-1.45216	-2.29709	-0.457704	-2.63887	2.94414	7.64272	-6.00343	3.60116	-64.0929	-1.4646	-2.04497	-1.09451	-2.91568	8.01131	-0.529361	0.581621	2.03922	-3.65296	5.71004	0.924317	-2.2817	3.9849	1.77858	5.78477	13.1853
5.59239	-5.4753	-1.2139	-0.199786	-1.22595	-0.754338	-0.083764	-2.0998	-0.081666	0.169445	-1.70812	-117.27	-1.05071	0.21027	-10.0882	-5.54766	-93.2096	0.545622	-2.03814	-1.06764	-1.03527	-0.309579	0.896404	-2.82655	2.5465	-1.84452	13.1555	0.60441	0.086705	-2.74156	-0.100056
5.6576	-3.94748	36.8475	-1.57843	-2.28316	-0.3698	0.662773	-0.73678	-1.505	0.580851	-5.37965	-0.980539	5.6442	2.10979	0.578694	-3.4381	-0.771984	0.328929	0.761878	-1.05803	-1.12327	0.518979	2.08427	7.64576	0.344695	-0.204888	12.0864	0.342867	-0.47876	0.259777	0.558478
5.7232	-0.977469	-3.07554	0.22495	-0.683214	1.22212	0.482053	-5.09867	-1.08392	-8.97043	-4.90004	0.148007	1.32846	-3.10861	301.96	-2.05599	-0.444284	-0.263736	-2.40949	-0.058159	4.70244	3.51502	53.5244	-0.195613	0.040876	3.6335	1.32261	-0.480067	0.494489	0.495037	-0.943412
5.78917	0.42296	2.33575	0.975139	-0.226369	-0.0603	-3.76571	-2.02999	-4.79727	-1.9505	0.656858	0.731673	-0.306216	0.592974	3.3884	-0.735358	-3.17607	-3.58854	-0.989198	1.10052	-4.24994	1.92048	-1.23264	-0.043972	-27.0327	14.9924	3.70583	-1.244	0.260215	-2.22082	-0.003527
5.85552	-1.06315	0.278464	0.157995	-0.113457	-0.328645	-4.02114	2.31794	-2.54159	4.71121	6.44254	-0.20101	-0.717716	0.472899	-2.00198	-2.82686	-1.75631	-2.08817	-1.46705	9.92354	-1.97511	-0.301736	-0.182773	0.794701	-1.40761	-0.414518	3.21993	-0.338876	0.93931	3.13063	-1.38273
5.92225	16.856	49.9701	0.337276	1.60767	0.671726	-0.327697	-2.76392	3.45221	-8.16872	0.462178	-2.39016	-1.19558	2.55289	-57.6767	-0.169052	4.24428	-4.31069	-1.83344	-4.23628	-1.73067	-0.624686	-0.411644	0.73397	-0.750761	-1.25597	4.89558	19.4606	-0.121586	-2.15056	15.2366
5.98936	1.82928	0.245126	-1.69256	-0.782101	0.333541	-1.18704	-0.076939	15.858	-1.43099	-1.17546	1.15382	3.08385	-0.953148	-1.82363	3.14116	-1.97322	-0.990349	0.997877	-4.89854	-4.88268	1.19156	6.38089	-2.44865	-2.45038	-2.27221	125.803	-0.182876	3.75614	-1.80948	-0.74539
6.05684	-2.39874	0.162753	-0.061819	-4.31284	-0.51975	-0.585925	0.522487	-0.311951	1.60892	-4.17946	1.15164	1.4966	-0.410646	-1.27582	-1.22306	2.37799	-0.820968	-57.3354	-0.301183	-3.37967	-0.125855	-3.19733	0.482951	-3.48982	2.67568	-1.34931	-1.27237	-2.40279	-2.12847	1.7528
6.12471	-2.67527	-1.56739	-1.81514	8.1349	0.827328	-9.12805	-1.90965	0.756474	-0.918179	-1.3762	-3.42079	0.49779	0.27819	-1.00361	-8.56273	-2.0062	-14.9763	-2.57252	1.99954	-0.817098	-3.82519	0.006732	-0.362989	-1.54296	42.7758	3.03184	1.44625	2.68503	4.45861	3.33304
6.19295	0.324965	-76.2075	-1.2065	-1.84733	-0.645455	3.64232	8.55569	-5.16698	-1.61556	-2.44211	-1.36871	0.354409	0.190304	0.974075	2.68383	-3.64492	-25.8697	-6.41271	-2.33531	2.88706	3.33388	-1.60001	0.480317	0.779263	-1.24138	-1.66009	-0.580215	-0.21055	-0.016449	-1.93472
6.26157	-3.07973	-7.57938	-0.458707	-0.88981	-0.1045	-5.63381	1.6252	-3.13025	-3.30652	-0.980202	-0.309583	-2.7018	-3.61994	-1.36041	0.894635	-0.947071	3.02505	-2.78534	-3.4858	5.322	4.6428	-29.6689	3.03033	-0.010029	1.91878	-1.39308	-0.275394	12.1421	8.98498	-2.88793
6.33056	-2.97257	-1.72555	-0.577073	-5.42723	0.436105	-3.06409	49.9121	3.17971	-0.465112	-4.00973	1.94582	1.26442	-2.11281	-1.04406	-1.34706	11.9977	-2.59266	-0.640518	3.92104	-7.0616	0.64485	-0.532272	-0.644693	-16.7333	0.265911	12.8386	-0.326069	-0.78765	-0.274964	-3.05511
6.39994	-3.05988	-11.5027	0.365534	-1.5135	0.166952	1.59674	-17.3384	0.285301	-0.397786	-1.67809	-7.80539	-1.86939	15.1519	-0.508902	1.06567	-1.05079	4.63804	-1.08996	-0.914621	-0.868125	-0.995694	-1.36894	0.869511	2.25554	0.824021	-1.88089	-0.50348	-0.401119	2.7632	-1.49659
6.46969	1.39325	7.97605	0.376693	-1.55351	-0.374049	-66.7467	6.51494	3.91092	-0.917835	-2.22631	-10.657	1.55361	0.883016	12.3905	-1.83724	1.33926	-6.81089	-1.29212	1.65493	6.19589	2.25864	-2.24896	-5.5435	-0.553684	-0.983919	0.539722	-0.904167	4.86203	-0.988926	0.295352
6.53983	-9.09239	0.297527	-4.12458	-0.486165	0.481189	-3.41255	2.23491	-0.399791	-0.244661	-2.72387	1.47712	-5.28995	7.47895	13.5045	-0.748032	-19.1184	0.573734	-2.51847	0.002621	2.88335	-0.787714	-1.19703	-0.422735	1.80197	0.399663	-62.6083	-0.05736	-1.46116	-2.96405	3.17902
6.61034	-0.697776	-0.89462	-12.5317	-7.30891	-0.089356	-7.47201	-2.54239	-4.12458	2.78095	-6.75358	3.90188	-0.088361	2.06216	1.67719	1.64128	-5.00035	-1.31291	80.0514	-1.97749	-0.098681	33.0357	0.094037	-0.185415	-1.82873	1.17741	0.877261	-0.313855	-0.737254	14.8989	-0.086519
6.68122	-0.908441	-8.22634	-2.79638	-7.07697	-0.717421	-6.06258	-10.2981	8.06072	-5.31128	5.26642	0.272741	-19.4949	-1.68363	-4.89082	-2.58999	1.04128	-2.10944	0.291606	-0.063462	-1.95701	-11.8191	-0.098915	-3.97023	-0.549628	-1.28222	-0.39758	0.148481	13.3385	0.77801	0.339688
6.75249	0.502524	5.66357	2.19158	11.5253	-0.008779	-0.266251	-5.01247	-2.78155	4.0861	-0.85168	-5.16974	-6.9198	-2.72604	-3.88571	-6.60189	2.8522	-3.27931	0.604068	-2.00358	-4.36982	0.326373	0.462972	-2.46838	-0.511958	1.79216	-1.52561	-0.79213	-0.916738	-0.457351	-1.81464
6.82413	-1.66798	-0.625151	-3.51475	0.6396	0.435034	0.849883	1.08739	-1.23054	-1.34056	-1.69753	-4.95623	0.533985	-0.509299	-0.965683	-2.10902	-1.70082	-0.351732	-1.91657	-2.24925	42.8781	3.01254	1.92911	8.1702	-0.119937	-1.34158	-1.4012	0.751234	-0.55338	-0.017259	-0.981904
6.89615	1.15784	1.15021	-1.08063	0.729196	-0.490256	-0.298574	-5.69468	3.20525	-0.247655	-3.28476	-5.43541	-1.96389	4.31133	0.26188	-1.04508	-4.50391	-5.13516	31.3947	-1.91007	-73.9861	0.019035	-0.553802	1.23799	0.147268	-9.20414	-0.02583	-0.104733	-1.85354	-3.36232	2.70165
6.96855	-2.07543	0.918319	-0.785452	-5.46066	0.760617	-3.03132	-0.057781	-1.36924	0.76837	-44.0053	1.24585	-2.15147	-1.46801	0.673064	0.973713	85.0339	-3.74772	0.028586	0.861878	-8.46363	0.658388	0.722989	-8.76529	14.5057	-0.821891	27.7487	-1.60868	-9.23784	1.73674	-1.18377
7.04133	-4.78444	0.640945	69.3299	-1.34779	-0.372328	-3.55549	13.7827	1.16055	-0.559985	0.001776	-0.025861	-1.17685	-3.0624	-3.76822	-1.09716	39.9607	-149.742	-0.934686	0.258793	2.25078	-9.09605	4.34254	-1.95498	-3.88824	-1.73446	-4.89517	-1.02553	2.84505	0.223099	-2.63142
7.11449	0.360399	36.1283	-0.098882	-3.00863	0.504773	2.65664	-1.46414	-1.23824	9.38311	-11.8096	-5.51364	-6.57895	-2.85656	-3.04539	11.5354	-6.10335	-23.249	-1.87371	-0.741799	-1.08477	-1.56207	0.12151	0.001847	-1.93986	-0.957035	-1.90382	-0.205652	5.12318	-3.11811	-1.24395
7.18802	4.50373	-3.54745	0.724029	-3.02005	-0.279669	-3.33177	-1.35353	0.924385	-0.671296	-5.51235	-0.892812	-2.47215	-0.154382	-10.3615	17.6214	0.610962	0.026654	0.262808	-1.43223	-0.229853	-2.06457	-2.95816	-0.185774	6.44264	-1.03458	-1.52562	-1.2062	-18.1144	-0.963983	4.35229
7.26194	3.64479	1.18453	-0.987809	-14.6953	-0.056068	-2.51713	-3.33465	0.389024	-2.70305	1.01415	2.93162	7.94537	-1.29902	-1.71406	-33.1418	1.20022	0.241372	-1.22501	2.10445	-1.61774	-0.199257	0.212328	1.79942	1.80865	-5.6614	-1.58176	-0.911144	-1.458	-0.151014	5.25635
7.33623	-2.61996	-0.962904	-6.57423	-0.178281	0.10018	-1.35899	0.336569	-1.48601	3.0248	-9.97287	-0.198393	1.14267	-2.5945	-0.69382	-1.06928	-1.64759	-4.34219	-3.06069	1.20251	-3.10818	4.06115	4.92864	-0.609562	-2.61989	4.78576	-1.95891	-1.40017	-2.18102	3.16584	-1.67067
7.41089	2.06029	-8.37394	-4.47694	-142.542	0.182658	-1.73755	-2.12581	-1.87963	-2.1417	0.84058	-4.14083	-12.1042	2.0342	3.15162	0.008542	0.1551	0.080743	0.531738	-0.929954	127.053	-1.61887	-0.374415	4.44362	0.413644	-0.858985	-1.61621	-1.49969	-1.39529	-0.740626	1.04654
7.48594	1.41754	-6.28762	-2.21729	-0.83602	-0.180879	-1.5891	-0.077435	0.199747	-6.76614	-0.829239	-0.245943	-1.54158	-3.11783	-2.504	-11.2715	0.269405	0.186998	2.342	-0.580903	-0.995087	-0.209998	-3.21234	-8.28545	-0.394844	-1.18358	-1.29922	-1.53096	-1.51448	6.8716	-9.24276
7.56137	-1.15154	-2.33532	-0.926411	0.112756	0.046018	-0.878998	-1.31616	0.326078	-0.457531	12.1989	-2.10762	-1.76176	-13.0321	-0.267958	-2.26008	-1.2506	-4.65606	7.02251	0.6036	-1.13548	-1.21257	-0.602017	-5.42785	-0.054956	-0.688637	-1.56772	1.6421	-3.08937	-1.84619	-4.76609
7.63717	-0.639249	1.2785	-0.414064	-1.1853	0.114941	-10.1627	-0.878483	1.10472	-1.39972	-1.94989	-8.03327	-0.810409	30.8203	-1.72178	-1.44258	-2.71368	-1.88579	0.364689	-0.875042	10.9309	-28.6775	-1.94452	0.587171	-0.230391	-0.696195	-0.846913	0.149745	0.957508	-3.94361	-1.84186
7.71335	6.8625	3.2488	-2.52023	-1.39714	-0.184195	-0.150521	1.20016	-29.8786	0.878339	-2.56143	2.5112	0.573426	-1.05547	-1.89917	-2.56142	0.79726	-1.16029	-4.93647	3.37709	0.767517	-0.396441	0.11485	2.79407	-2.37065	-1.88539	2.27568	-1.77958	9.61664	-0.506329	-0.193027
7.78991	-1.66973	0.408543	-1.31864	-0.528611	0.376071	-264.681	-1.52823	0.878083	1.2732	3.27595	0.715736	0.119278	-4.95531	0.339389	2.4666	1.10225	-3.9216	-1.61403	-0.66941	-0.27865	-0.458532	5.993	2.50469	0.169458	-0.854808	1.2242	-1.43191	-0.263594	-0.236271	0.457806
7.86685	0.848742	-11.678	-2.01063	171.17	-0.15016	-0.996699	12.0732	-2.44197	-2.40794	0.642308	-1.27021	-22.3946	-5.74511	-9.2367	-29.236	-0.772119	-0.176927	0.286438	19.5236	-0.669253	1.12043	-0.015525	-0.860099	1.38826	3.86124	-0.083224	-1.3409	0.75849	0.585541	-20.472
7.94416	-0.950234	-3.49201	-0.266013	-10.2246	-0.294051	-3.92337	-2.7637	-5.1769	-2.57647	2.69458	0.379107	1.56345	-1.16775	-1.67508	-0.970691	-0.434056	-0.45001	-12.1931	-3.84924	10.1108	-2.11006	0.102441	1.29241	-0.647437	-0.774692	-2.35954	-0.759387	-2.01838	0.16669	-1.5015
8.02185	0.497646	-6.21069	-0.917157	2.01007	0.116503	-1.65094	-27.0252	-1.5202	-36.9325	-19.0584	-0.985469	0.907874	1.85518	0.641109	-0.661408	0.642382	1.42232	-0.113686	-2.17893	-0.315126	0.302446	-1.61857	-0.064453	0.075632	2.49437	0.666739	-0.580676	-1.01377	-0.00518	-0.59322
8.09992	0.935062	-2.5794	0.89628	-5.43728	-0.015377	-0.8584	-1.20944	-6.10237	0.140839	-16.7792	-0.790334	-1.81463	-1.47854	0.334973	0.352617	-1.28229	-2.16895	-0.214714	-2.42219	-0.023071	-1.61079	-0.384549	-0.63852	2.17146	-1.46575	-1.1074	-0.595905	-1.42968	0.466322	-2.01018
8.17837	-7.69712	0.55946	1.19141	-2.87711	-0.168143	3.50616	-1.04072	-2.06284	3.44263	2.46857	-0.744315	0.595653	0.273785	1.67227	-4.58727	-0.450277	1.66876	1.29049	-2.01242	-3.43026	-3.91874	1.07695	1.62058	-6.42216	-1.78441	1.09874	-0.886687	-0.843742	-2.18853	-1.53556
8.2572	0.133658	-12.1672	-4.15362	-0.397156	-0.07665	18.4434	6.19072	-1.08945	0.117513	0.508817	-8.56397	-3.37701	0.915928	-2.41097	0.179959	-2.73553	-12.7073	-4.81965	1.04444	-3.90168	4.34148	0.1318	10.6587	-1.0485	-1.41891	-1.02845	-0.626877	-0.578096	-1.46403	-0.643523
8.33641	2.52493	-2.25705	-1.09385	-4.16519	-0.378919	-0.581459	-0.477938	-1.39085	-0.363518	1.03868	7.10569	-0.012372	0.804167	-1.30071	-1.05682	-2.0267	-0.418068	-0.161471	0.822566	-1.63305	1.49399	0.043457	-0.794995	-1.22189	-0.24747	-1.19799	-0.609599	0.238287	-1.64232	-0.298669
8.41599	-1.20085	-10.6397	-1.53408	-0.512129	0.485379	-7.03668	2.85356	-0.833816	2.19637	-1.12403	-2.32717	-18.0531	-6.82197	9.59919	16.0215	-4.61367	-2.5496	-0.504582	8.06324	-1.27548	-0.806463	-2.90287	-1.67455	6.44696	-2.1415	11.6251	2.03446	-0.393177	0.25148	1.38732
8.49595	-1.52425	1.03923	4.94919	-0.941224	-0.53014	0.04495	-2.34701	0.165978	-0.79835	-8.95604	-1.6563	-3.15145	-1.99847	-0.629157	-1.39276	-1.72694	-1.58157	-2.42705	-1.3542	3.45516	0.5878	-0.970854	-0.768437	1.48413	-2.11086	-2.14039	-1.80732	-1.49725	-0.931142	-0.491254
8.57629	-92.7919	-55.5464	-106.365	-9.59206	-0.10755	-2.48424	-1.16545	10.264	1.26691	-8.88639	-1.32523	-0.858328	1.15048	2.58073	6.48465	-3.12634	-2.2242	-1.08436	-0.537747	-24.2523	0.589501	4.46548	-1.23583	-0.911733	6.42916	-1.61374	-2.06943	0.596251	-1.93778	0.835107
8.65701	-0.946283	-0.128138	0.270695	0.130584	0.145045	-1.5765	-4.6001	-5.0735	-0.458553	-0.326727	0.64406	1.73327	-32.5935	-0.896253	-0.362875	-0.822289	0.293162	3.63734	-0.676547	-0.608864	15.6644	0.034516	-1.87246	-2.08546	-1.34281	2.66949	-1.16681	0.11252	-0.624061	-1.39039
8.7381	-3.01365	11.7083	-0.242655	13.1796	0.095946	-16.1001	-0.147477	-128.282	-0.259687	-0.885301	5.74432	-0.464358	-1.14612	-9.54393	12.0276	0.310118	1.02371	-0.936347	-28.8456	0.331157	0.268388	0.044792	1.01742	-2.87253	-1.53289	-1.10756	-1.94765	1.88665	-0.530811	-0.213228
8.81958	-2.39092	-0.138153	-2.88676	-2.75311	-0.212506	-0.491159	-1.24893	-6.39052	-1.1802	-21.4539	-4.36187	-0.523932	2.07813	-25.4248	-0.116976	-0.592713	-5.44018	-8.98759	-1.50268	-0.074688	-1.79252	0.033158	0.976786	0.210486	0.053771	-1.63001	-2.04615	-0.521774	-0.194406	-0.926868
8.90143	2.09783	-0.70369	-1.93557	3.17027	0.240876	-7.78326	5.84705	-0.890197	-0.72287	-0.431199	0.790241	-21.7817	0.316794	-1.77149	1.24219	-0.253245	2.50827	-1.90122	-1.26484	-0.165281	-1.27722	1.26561	-0.746088	1.14529	-0.735732	0.704873	0.365304	-0.829152	1.30578	-0.449106
8.98366	-0.92029	-4.37831	0.540035	2.01027	-0.076625	3.7389	4.23324	-1.32708	-1.9159	-0.287052	-3.08235	5.85524	-0.646965	-33.2601	-5.74343	-4.12901	-0.32363	-1.44927	2.50308	-0.908853	-0.144972	-2.63103	6.72175	4.91048	-1.36619	1.2967	1.37049	-0.809457	-1.26095	-0.414712
9.06627	-2.20942	-2.97338	-1.68702	1.89079	-0.042662	-1.31544	15.6174	0.259632	-0.628352	-0.321417	-8.1763	1.50999	-0.718265	1.62895	1.65969	-1.76608	-0.502102	-0.866543	-2.30866	-1.78257	-0.217145	-1.79015	2.50162	0.637259	0.808048	-2.08991	-0.853918	2.57202	1.1331	0.028427
9.14925	9.21205	-0.422435	-1.40217	-4.32496	0.045498	-20.3895	-2.88228	7.14781	-10.6516	-4.60494	0.227406	-1.52257	-1.85751	1.12449	-2.44375	7.27248	-0.074877	-0.173251	-0.085453	-1.27725	0.000217	3.35799	1.26182	-1.15648	2.90605	-1.48253	-1.41834	-1.61798	-0.249885	-1.34906
9.23262	-2.51971	-2.39796	0.267821	0.10493	-0.004076	-0.083209	-13.1146	1.37301	-1.92506	-0.657542	-2.35029	-2.23426	-2.1914	0.268566	-0.942898	-0.92921	-1.58058	0.651764	2.7832	3.18234	0.282354	1.3009	-16.3299	-0.017352	-3.49427	-24.7352	-1.40258	-0.611953	2.44928	1.10917
9.31636	-0.496689	-5.39256	-0.897106	-2.63509	0.269608	-1.57394	-0.877326	-4.4908	-1.91873	-4.47086	2.21665	-0.757289	-2.93141	-20.3882	-1.10831	-0.888052	-0.655118	3.09617	-0.081735	0.816066	1.39431	-0.231056	-1.17303	-0.25403	-0.194476	7.49876	-1.32336	0.258119	-0.10777	0.518392
9.40048	-33.2477	-1.64453	-1.16479	-1.29391	0.026191	-0.156195	-1.70369	0.865626	-0.677801	1.57853	-0.040452	-0.697766	0.908582	-0.247887	6.19163	-1.5366	-0.704085	-1.32353	-0.393365	0.182347	17.4337	-1.07152	-0.553389	0.587501	0.612089	0.578077	-1.31848	1.45903	-1.05041	1.52751
9.48498	-1.39063	4.00967	-49.5867	-11.8608	-0.273881	-0.330889	0.737401	-0.054497	0.260992	-14.3103	-1.35625	2.12401	0.347302	1.24578	-0.461205	0.459666	10.8907	-0.843347	2.46549	-0.288462	-2.49788	0.647107	-0.852997	-1.14204	-0.798697	-2.10018	-1.81329	0.123032	1.73707	-1.67685
9.56985	-1.1173	-0.598844	-2.23713	-2.4203	0.094531	1.281	-4.29371	-1.68713	-4.55279	-0.092956	0.079799	0.959395	25.1738	-1.56234	-36.0006	-1.36284	1.07969	0.159782	1.92458	-0.061821	-2.69546	4.83092	-0.284223	-0.812881	-0.391771	-1.1846	-1.58916	14.9913	-1.11131	-0.727575
9.65511	1.16944	-2.0387	3.41523	2.14811	0.170482	0.786241	-0.666041	-0.329601	0.795669	-2.90663	0.390816	40.5782	-0.254603	-0.032696	-0.72835	-1.44634	1.63339	-0.418083	0.746916	1.07203	1.77926	-0.026215	-0.842809	-1.5926	-2.0945	-1.7892	0.02617	-0.641503	-0.47205	1.01521
9.74074	-2.62149	-9.74839	4.22454	-3.25032	-0.152942	-0.135786	113.274	11.3964	-2.39962	-0.628876	-6.35689	-2.22005	-0.186105	2.59907	-0.481501	-0.827328	-1.02275	0.871918	0.402639	-1.24973	0.940082	0.982675	0.130969	-0.517162	-0.835209	-1.73822	-0.293257	-1.5665	-1.63042	-0.999301
9.82675	1.50888	3.13478	-1.89648	-2.0509	0.057844	-7.96288	-0.804777	-0.106789	-12.921	1.18917	-0.336398	-1.47159	0.194254	-1.43278	-1.10367	5.46066	-0.835294	-0.542626	-0.262643	-0.711263	-0.285907	0.252448	-0.121232	-0.194396	-0.916464	0.094417	-1.87192	-2.2822	-0.082211	-1.87722
9.91314	-0.163143	-1.08164	-2.39387	-1.15972	0.280451	9.52831	-0.101302	-1.28961	-2.03236	1.83665	-30.3778	-1.48169	0.234565	-0.894836	-87.1074	-0.518638	-0.463103	-0.601817	-1.38072	0.190607	0.050402	4.97432	-0.356963	0.092805	-0.867329	0.031692	-1.76069	-1.01126	0.385198	-0.694688
9.99991	-0.459309	2.18892	2.69866	-2.39746	-0.156132	1.55167	-1.72364	-2.24648	-1.61579	-2.75617	2.11352	-0.7557	0.522905	-1.23366	-0.558534	-1.45234	-3.40615	0.41231	0.224904	-1.24266	3.42393	-0.410882	-0.845712	0.454937	-1.0143	-0.393778	-1.20426	-0.734575	-0.676062	-0.793733
10.0871	-1.32489	0.156601	-0.056612	0.639352	0.360512	0.866477	2.69846	2.12692	-1.70299	0.519847	-2.19106	6.98596	-1.70483	1.51867	-1.4366	1.07677	0.289624	-11.5313	0.45536	-1.07165	0.517626	0.409529	0.858594	-0.018925	0.171481	-1.23105	-0.974406	-0.623236	-0.617826	-0.498407
10.1746	-2.447	13.8598	-1.75931	2.79492	-0.153967	-1.95407	16.8889	14.939	-14.6117	-2.86093	-0.373877	0.811409	3.15867	-0.045716	-0.478472	-1.24178	0.232601	0.957762	-1.11115	-0.531181	-0.512214	0.369675	-0.081783	0.039897	-0.623232	-1.3431	-1.34501	-1.32558	-0.119004	0.323887
10.2625	0.545834	0.243911	-0.913103	-2.22663	-0.19864	-0.927297	13.0471	-1.03472	-1.06273	0.738377	-4.36133	14.7853	-3.26085	-8.67846	0.78784	0.147174	-0.879629	-1.27411	-1.01444	-0.963771	0.345061	-0.336365	-0.85603	0.31774	-0.689252	1.04351	-0.84257	0.74221	1.25199	1.00089
10.3508	0.793376	-0.236403	-1.65268	-5.24182	0.293882	-0.86891	0.19636	1.27366	0.148792	1.60109	7.9167	-1.50533	0.970185	-0.78206	-1.11681	3.26987	0.155917	-0.310881	1.14313	-0.427482	5.52487	-1.10421	-1.63184	-0.515663	-1.51016	-0.43784	-1.0678	-1.30188	0.039896	-0.839293
10.4394	-0.39219	-0.970655	2.7875	2.60122	-0.068192	-0.960309	-0.40009	-3.72438	1.48642	-0.353769	0.123403	0.767704	-1.57011	-1.54084	-0.586094	-0.324145	-1.30057	0.329035	2.49835	-0.156743	-1.09901	-0.536054	-0.141994	0.148279	0.422774	0.450017	-0.439744	-1.44797	0.447885	-1.18246
10.5284	6.94902	0.898598	-2.546	0.140254	-0.213777	0.32296	0.896487	0.196893	-0.888075	2.88824	0.2405	1.2384	-0.862593	-0.464655	-9.77621	-1.30007	-1.14521	1.21822	0.483644	0.726658	-0.71332	-0.143289	1.28711	-0.148084	0.328934	-1.05671	-0.700532	-0.735242	0.547594	-1.14152
10.6179	-1.61366	11.4883	7.38838	-1.27694	0.195038	-2.77089	0.165087	-1.12232	-0.335883	0.11417	-0.621514	1.78584	1.87879	-5.451	-0.069485	0.375939	-0.678292	0.183508	0.25525	-0.296289	-0.621847	-0.008877	0.815804	-0.26872	0.656778	-0.438578	-1.73006	0.414659	-0.301849	-0.826521
10.7077	0.12728	0.926102	0.507029	-3.26015	0.043463	3.13791	-1.09238	-0.204955	11.4917	0.965437	-0.678038	-1.57872	-0.605971	-1.3342	3.53533	-0.199488	0.002187	-0.325409	-0.789645	1.66861	-0.160402	-0.2002	0.864183	0.18921	-0.376473	-0.242442	-0.418927	-16.1761	-1.08929	-0.937504
10.7978	-4.4424	-0.15882	5.39459	-1.56224	-0.14816	-0.497834	-1.63334	-0.311196	0.160352	-0.659608	-0.20375	-1.29233	1.06545	-0.662192	-1.60114	-0.16793	0.394861	0.164733	0.294455	-0.173994	-0.716736	0.606592	0.058966	0.184453	-0.040191	1.38967	-0.189449	-1.36677	-2.03944	1.7167
10.8884	1.51474	-1.85386	-1.84449	-2.63671	0.205583	-0.621325	-0.07211	0.656827	-0.791462	-0.332299	-0.371949	0.562135	0.227499	0.307634	-0.153382	-0.358763	0.323985	-0.350616	-0.902861	-0.400245	0.503015	0.609222	-0.142959	-0.245032	-0.069731	-0.645314	-1.23013	-0.441069	-1.64987	-0.617886
10.9793	-9.97751	-3.09824	-31.5323	-1.49992	-0.098755	-1.28045	-4.58057	0.018961	-3.7777	0.509756	-0.941943	-0.43275	-0.472019	-1.17699	0.368289	0.092839	-0.39161	1.0097	-0.408136	-0.8811	-0.337533	-0.057798	0.741269	0.194826	-0.511061	-0.666181	-1.05758	-0.575851	-0.911346	0.599391
11.0706	2.51291	0.475534	-0.50051	1.08997	0.053833	-0.011511	-0.819974	1.43636	-0.013828	-1.42316	1.11793	0.043514	0.319613	0.777648	-0.747579	0.121473	-0.577525	0.327862	-0.677637	-0.032193	-0.351221	0.348818	-0.245955	-0.398679	0.15972	-0.615521	-0.471316	-0.788054	-0.160062	0.142728
11.1623	-0.799694	3.34361	0.550335	-0.606202	0.006082	-1.39015	-1.06583	-1.13539	0.31016	-0.007274	9.67922	-0.685936	-0.577746	-0.579523	-0.43699	0.024138	0.042875	-0.028857	1.0189	-0.183426	-0.398835	-0.364199	-0.344056	0.233356	-0.686401	-0.177922	-1.09091	-0.308023	-0.792814	-1.2446
11.2543	-0.644601	-0.481186	-1.06695	-0.84208	0.044326	-0.148658	0.088468	-0.805884	0.208017	-0.716023	-0.616164	0.487836	-0.345	-0.55183	-0.918145	-0.260844	-0.280651	-0.138937	0.320695	-0.08036	0.393868	-0.179339	0.009154	0.382897	-0.26786	-0.381921	-0.754329	-0.658775	-0.788913	-0.794829
11.3468	4.27275	-5.58689	-2.63756	-1.62124	-0.63016	-1.6318	-1.22697	-3.26599	-1.221	-2.55749	6.97902	-4.57393	-4.29837	-0.003758	2.93125	-0.526694	2.29013	-2.98883	-1.10473	3.39204	-0.107166	-0.74828	-5.51679	1.74582	-1.47157	0.588452	1.5379	-0.580975	-0.106564	1.59436
11.4396	-0.57443	-0.53241	0.656322	0.1283	0.059576	-0.173283	-0.28902	-0.223698	-0.373507	-0.326931	-0.325328	-0.030052	-0.150292	-0.254448	-0.000691	-0.387519	-0.136071	-0.02664	-0.096347	-0.201514	-0.133152	-0.255916	0.001477	-0.18268	-0.135839	-0.209662	-0.650232	-0.21083	-0.384624	-0.353829
11.5328
